# Supplementary material
Source: publisher figshare collection journal article supplement (https://acs.figshare.com/ndownloader/files/5152915)
Supplement: Supplementary file 1 [file 5152915]

data_comp1a

_audit_creation_method            SHELXL-97
_chemical_name_systematic
;
  ?
;
_chemical_name_common             ?
_chemical_melting_point           ?
_chemical_formula_moiety          ?
_chemical_formula_sum
  'C42 H40 As1.50 Cl4 N0.50 O4 Re'
_chemical_formula_weight          1056.13

loop_
  _atom_type_symbol
  _atom_type_description
  _atom_type_scat_dispersion_real
  _atom_type_scat_dispersion_imag
  _atom_type_scat_source
  'C'  'C'   0.0033   0.0016
  'International Tables Vol C Tables 4.2.6.8 and 6.1.1.4'
  'H'  'H'   0.0000   0.0000
  'International Tables Vol C Tables 4.2.6.8 and 6.1.1.4'
  'N'  'N'   0.0061   0.0033
  'International Tables Vol C Tables 4.2.6.8 and 6.1.1.4'
  'O'  'O'   0.0106   0.0060
  'International Tables Vol C Tables 4.2.6.8 and 6.1.1.4'
  'Cl'  'Cl'   0.1484   0.1585
  'International Tables Vol C Tables 4.2.6.8 and 6.1.1.4'
  'As'  'As'   0.0499   2.0058
  'International Tables Vol C Tables 4.2.6.8 and 6.1.1.4'
  'Re'  'Re'  -1.0185   7.2310
  'International Tables Vol C Tables 4.2.6.8 and 6.1.1.4'

_symmetry_cell_setting            ?
_symmetry_space_group_name_H-M    ?

loop_
  _symmetry_equiv_pos_as_xyz
  'x, y, z'
  '-x, -y, -z'

_cell_length_a                    10.7030(10)
_cell_length_b                    11.6290(10)
_cell_length_c                    38.132(5)
_cell_angle_alpha                 88.440(10)
_cell_angle_beta                  84.250(10)
_cell_angle_gamma                 63.190(10)
_cell_volume                      4213.8(8)
_cell_formula_units_Z             4
_cell_measurement_temperature     293(2)
_cell_measurement_reflns_used     ?
_cell_measurement_theta_min       ?
_cell_measurement_theta_max       ?

_exptl_crystal_description        ?
_exptl_crystal_colour             ?
_exptl_crystal_size_max           ?
_exptl_crystal_size_mid           ?
_exptl_crystal_size_min           ?
_exptl_crystal_density_meas       ?
_exptl_crystal_density_diffrn     1.665
_exptl_crystal_density_method     'not measured'
_exptl_crystal_F_000              2080
_exptl_absorpt_coefficient_mu     4.347
_exptl_absorpt_correction_type    ?
_exptl_absorpt_correction_T_min   ?
_exptl_absorpt_correction_T_max   ?
_exptl_absorpt_process_details    ?

_exptl_special_details
;
  ?
;

_diffrn_ambient_temperature       293(2)
_diffrn_radiation_wavelength      0.71073
_diffrn_radiation_type            MoK\a
_diffrn_radiation_source          'fine-focus sealed tube'
_diffrn_radiation_monochromator   graphite
_diffrn_measurement_device_type   ?
_diffrn_measurement_method        ?
_diffrn_detector_area_resol_mean  ?
_diffrn_standards_number          ?
_diffrn_standards_interval_count  ?
_diffrn_standards_interval_time   ?
_diffrn_standards_decay_%         ?
_diffrn_reflns_number             16122
_diffrn_reflns_av_R_equivalents   0.0182
_diffrn_reflns_av_sigmaI/netI     0.0781
_diffrn_reflns_limit_h_min        0
_diffrn_reflns_limit_h_max        12
_diffrn_reflns_limit_k_min        -12
_diffrn_reflns_limit_k_max        13
_diffrn_reflns_limit_l_min        -45
_diffrn_reflns_limit_l_max        45
_diffrn_reflns_theta_min          1.61
_diffrn_reflns_theta_max          25.05
_reflns_number_total              14918
_reflns_number_gt                 9084
_reflns_threshold_expression      >2sigma(I)

_computing_data_collection        ?
_computing_cell_refinement        ?
_computing_data_reduction         ?
_computing_structure_solution     'SHELXS-97 (Sheldrick, 1990)'
_computing_structure_refinement   'SHELXL-97 (Sheldrick, 1997)'
_computing_molecular_graphics     ?
_computing_publication_material   ?

_refine_special_details
;
  Refinement of F^2^ against ALL reflections.  The weighted R-factor wR and
  goodness of fit S are based on F^2^, conventional R-factors R are based
  on F, with F set to zero for negative F^2^. The threshold expression of
  F^2^ > 2sigma(F^2^) is used only for calculating R-factors(gt) etc. and is
  not relevant to the choice of reflections for refinement.  R-factors based
  on F^2^ are statistically about twice as large as those based on F, and R-
  factors based on ALL data will be even larger.
;

_refine_ls_structure_factor_coef  Fsqd 
_refine_ls_matrix_type            full
_refine_ls_weighting_scheme       calc 
_refine_ls_weighting_details
  'calc w=1/[\s^2^(Fo^2^)+(0.1000P)^2^+0.0000P] where P=(Fo^2^+2Fc^2^)/3'
_atom_sites_solution_primary      direct
_atom_sites_solution_secondary    difmap
_atom_sites_solution_hydrogens    geom
_refine_ls_hydrogen_treatment     mixed
_refine_ls_extinction_method      none
_refine_ls_extinction_coef        ?
_refine_ls_number_reflns          14918
_refine_ls_number_parameters      920
_refine_ls_number_restraints      0
_refine_ls_R_factor_all           0.1123
_refine_ls_R_factor_gt            0.0568
_refine_ls_wR_factor_ref          0.1746
_refine_ls_wR_factor_gt           0.1366
_refine_ls_goodness_of_fit_ref    0.954
_refine_ls_restrained_S_all       0.954
_refine_ls_shift/su_max           0.002
_refine_ls_shift/su_mean          0.000

loop_
  _atom_site_label
  _atom_site_type_symbol
  _atom_site_fract_x
  _atom_site_fract_y
  _atom_site_fract_z
  _atom_site_U_iso_or_equiv
  _atom_site_adp_type
  _atom_site_occupancy
  _atom_site_symmetry_multiplicity
  _atom_site_calc_flag
  _atom_site_refinement_flags
  _atom_site_disorder_assembly
  _atom_site_disorder_group
Re1 Re 0.12530(4) 0.64886(4) 0.127247(12) 0.05324(14) Uani 1 1 d . . .
Cl1 Cl -0.0325(3) 0.7940(3) 0.09033(9) 0.0719(8) Uani 1 1 d . . .
Cl2 Cl -0.0524(5) 0.6356(7) 0.1639(2) 0.235(4) Uani 1 1 d . . .
Cl3 Cl 0.1120(6) 0.8144(4) 0.16168(14) 0.169(3) Uani 1 1 d . . .
Cl4 Cl 0.1450(6) 0.4785(4) 0.09304(18) 0.181(3) Uani 1 1 d . . .
O1 O 0.2849(9) 0.6540(9) 0.0983(3) 0.103(3) Uani 1 1 d . . .
O2 O 0.2681(8) 0.5231(7) 0.15756(19) 0.070(2) Uani 1 1 d . . .
C1 C 0.4137(14) 0.5633(17) 0.0929(4) 0.127(7) Uani 1 1 d . . .
C2 C 0.4526(13) 0.4431(13) 0.1112(3) 0.095(5) Uani 1 1 d . . .
H2A H 0.5545 0.3990 0.1101 0.060 Uiso 1 1 calc R . .
H2B H 0.4239 0.3903 0.0981 0.060 Uiso 1 1 calc R . .
C3 C 0.3964(12) 0.4462(11) 0.1491(3) 0.071(3) Uani 1 1 d . . .
O3 O 0.5040(11) 0.5834(14) 0.0751(4) 0.185(7) Uani 1 1 d . . .
O4 O 0.4743(10) 0.3763(9) 0.1698(3) 0.097(3) Uiso 1 1 d . . .
Re2 Re 0.59886(5) 0.53589(5) 0.353682(12) 0.06544(16) Uani 1 1 d . . .
Cl5 Cl 0.6706(4) 0.4276(3) 0.40578(9) 0.0933(11) Uani 1 1 d . . .
Cl6 Cl 0.7987(4) 0.3872(4) 0.31966(11) 0.1031(12) Uani 1 1 d . . .
Cl7 Cl 0.4762(4) 0.4160(3) 0.34351(9) 0.0828(9) Uani 1 1 d . . .
Cl8 Cl 0.7095(4) 0.6676(4) 0.36103(9) 0.0916(10) Uani 1 1 d . . .
O5 O 0.4262(9) 0.6682(8) 0.3818(2) 0.076(2) Uani 1 1 d . . .
O6 O 0.5223(8) 0.6399(8) 0.31085(19) 0.074(2) Uani 1 1 d . . .
C4 C 0.3039(14) 0.7457(11) 0.3735(3) 0.066(3) Uani 1 1 d . . .
C5 C 0.2793(12) 0.7481(11) 0.3354(3) 0.075(3) Uani 1 1 d . . .
H5A H 0.2465 0.6841 0.3321 0.060 Uiso 1 1 calc R . .
H5B H 0.2017 0.8314 0.3315 0.060 Uiso 1 1 calc R . .
C6 C 0.3929(13) 0.7262(12) 0.3061(3) 0.070(3) Uani 1 1 d . . .
O7 O 0.2104(9) 0.8158(8) 0.3943(2) 0.081(2) Uani 1 1 d . . .
O8 O 0.3706(9) 0.7839(9) 0.2787(2) 0.088(3) Uani 1 1 d . . .
As1 As 0.22783(10) 0.08744(9) 0.04673(3) 0.0473(2) Uani 1 1 d . . .
C7 C 0.3789(10) 0.0308(10) 0.0761(3) 0.053(3) Uani 1 1 d . . .
C8 C 0.4877(12) -0.0918(10) 0.0730(3) 0.067(3) Uani 1 1 d . . .
H8A H 0.4884 -0.1499 0.0566 0.060 Uiso 1 1 calc R . .
C9 C 0.5975(12) -0.1289(12) 0.0945(3) 0.077(3) Uani 1 1 d . . .
H9A H 0.6712 -0.2120 0.0927 0.060 Uiso 1 1 calc R . .
C10 C 0.5952(13) -0.0414(13) 0.1183(3) 0.076(3) Uani 1 1 d . . .
H10A H 0.6677 -0.0660 0.1327 0.060 Uiso 1 1 calc R . .
C11 C 0.4899(13) 0.0794(13) 0.1210(3) 0.076(4) Uani 1 1 d . . .
H11A H 0.4915 0.1384 0.1367 0.060 Uiso 1 1 calc R . .
C12 C 0.3796(13) 0.1153(11) 0.1006(3) 0.073(3) Uani 1 1 d . . .
H12A H 0.3048 0.1976 0.1034 0.060 Uiso 1 1 calc R . .
C13 C 0.2482(10) -0.0520(9) 0.0170(2) 0.049(2) Uani 1 1 d . . .
C14 C 0.2509(11) -0.1617(10) 0.0320(3) 0.056(3) Uani 1 1 d . . .
H14A H 0.2424 -0.1696 0.0563 0.060 Uiso 1 1 calc R . .
C15 C 0.2664(13) -0.2589(11) 0.0100(3) 0.071(3) Uani 1 1 d . . .
H15A H 0.2688 -0.3340 0.0196 0.060 Uiso 1 1 calc R . .
C16 C 0.2785(14) -0.2491(13) -0.0254(3) 0.078(4) Uani 1 1 d . . .
H16A H 0.2872 -0.3163 -0.0397 0.060 Uiso 1 1 calc R . .
C17 C 0.2777(13) -0.1413(13) -0.0400(3) 0.077(4) Uani 1 1 d . . .
H17A H 0.2865 -0.1348 -0.0644 0.060 Uiso 1 1 calc R . .
C18 C 0.2641(12) -0.0418(10) -0.0190(3) 0.062(3) Uani 1 1 d . . .
H18A H 0.2656 0.0316 -0.0289 0.060 Uiso 1 1 calc R . .
C19 C 0.2275(10) 0.2235(9) 0.0174(2) 0.048(2) Uani 1 1 d . . .
C20 C 0.3370(11) 0.2574(9) 0.0168(3) 0.055(3) Uani 1 1 d . . .
H20A H 0.4096 0.2154 0.0310 0.060 Uiso 1 1 calc R . .
C21 C 0.3369(13) 0.3541(11) -0.0052(3) 0.073(3) Uani 1 1 d . . .
H21A H 0.4073 0.3800 -0.0051 0.060 Uiso 1 1 calc R . .
C22 C 0.2327(14) 0.4115(11) -0.0272(3) 0.074(3) Uani 1 1 d . . .
H22A H 0.2345 0.4745 -0.0425 0.060 Uiso 1 1 calc R . .
C23 C 0.1272(12) 0.3777(10) -0.0268(3) 0.065(3) Uani 1 1 d . . .
H23A H 0.0563 0.4180 -0.0416 0.060 Uiso 1 1 calc R . .
C24 C 0.1248(12) 0.2827(10) -0.0042(3) 0.062(3) Uani 1 1 d . . .
H24A H 0.0521 0.2595 -0.0040 0.060 Uiso 1 1 calc R . .
C25 C 0.0556(10) 0.1543(9) 0.0771(2) 0.046(2) Uani 1 1 d . . .
C26 C 0.0156(12) 0.0714(11) 0.0943(3) 0.071(3) Uani 1 1 d . . .
H26A H 0.0669 -0.0168 0.0899 0.060 Uiso 1 1 calc R . .
C27 C -0.1020(12) 0.1185(12) 0.1185(3) 0.070(3) Uani 1 1 d . . .
H27A H -0.1297 0.0613 0.1302 0.060 Uiso 1 1 calc R . .
C28 C -0.1780(12) 0.2469(13) 0.1254(3) 0.070(3) Uani 1 1 d . . .
H28A H -0.2576 0.2779 0.1415 0.060 Uiso 1 1 calc R . .
C29 C -0.1356(12) 0.3300(12) 0.1083(3) 0.075(3) Uani 1 1 d . . .
H29A H -0.1858 0.4179 0.1132 0.060 Uiso 1 1 calc R . .
C30 C -0.0189(11) 0.2851(10) 0.0837(3) 0.059(3) Uani 1 1 d . . .
H30A H 0.0087 0.3422 0.0718 0.060 Uiso 1 1 calc R . .
As2 As 0.33503(12) 0.24888(11) 0.26485(3) 0.0605(3) Uani 1 1 d . . .
C31 C 0.3207(12) 0.1651(11) 0.3077(3) 0.062(3) Uani 1 1 d . . .
C32 C 0.1919(16) 0.1763(13) 0.3212(3) 0.087(4) Uani 1 1 d . . .
H32A H 0.1131 0.2253 0.3094 0.060 Uiso 1 1 calc R . .
C33 C 0.178(2) 0.1172(18) 0.3513(4) 0.111(6) Uani 1 1 d . . .
H33A H 0.0894 0.1257 0.3599 0.060 Uiso 1 1 calc R . .
C34 C 0.293(3) 0.0444(16) 0.3693(4) 0.121(7) Uani 1 1 d . . .
H34A H 0.2817 0.0079 0.3906 0.060 Uiso 1 1 calc R . .
C35 C 0.424(2) 0.0261(15) 0.3552(4) 0.115(6) Uani 1 1 d . . .
H35A H 0.5043 -0.0280 0.3659 0.060 Uiso 1 1 calc R . .
C36 C 0.4351(16) 0.0906(12) 0.3246(3) 0.085(4) Uani 1 1 d . . .
H36A H 0.5228 0.0823 0.3155 0.060 Uiso 1 1 calc R . .
C37 C 0.2400(12) 0.4326(11) 0.2712(3) 0.063(3) Uani 1 1 d . . .
C38 C 0.1337(14) 0.4876(12) 0.2984(3) 0.078(3) Uani 1 1 d . . .
H38A H 0.1161 0.4360 0.3152 0.060 Uiso 1 1 calc R . .
C39 C 0.0537(14) 0.6206(13) 0.3002(4) 0.086(4) Uani 1 1 d . . .
H39A H -0.0150 0.6600 0.3188 0.060 Uiso 1 1 calc R . .
C40 C 0.0781(16) 0.6907(14) 0.2743(4) 0.095(4) Uani 1 1 d . . .
H40A H 0.0214 0.7793 0.2749 0.060 Uiso 1 1 calc R . .
C41 C 0.1790(16) 0.6402(13) 0.2479(4) 0.084(4) Uani 1 1 d . . .
H41A H 0.1949 0.6931 0.2312 0.060 Uiso 1 1 calc R . .
C42 C 0.2598(13) 0.5082(12) 0.2456(3) 0.073(3) Uani 1 1 d . . .
H42A H 0.3275 0.4712 0.2266 0.060 Uiso 1 1 calc R . .
C43 C 0.5294(12) 0.1850(11) 0.2479(3) 0.064(3) Uani 1 1 d . . .
C44 C 0.6163(13) 0.2148(12) 0.2653(4) 0.083(4) Uani 1 1 d . . .
H44A H 0.5812 0.2728 0.2843 0.060 Uiso 1 1 calc R . .
C45 C 0.7609(15) 0.1551(16) 0.2537(5) 0.112(5) Uani 1 1 d . . .
H45A H 0.8236 0.1699 0.2659 0.060 Uiso 1 1 calc R . .
C46 C 0.8088(17) 0.0754(14) 0.2247(4) 0.100(5) Uani 1 1 d . . .
H46A H 0.9045 0.0371 0.2173 0.060 Uiso 1 1 calc R . .
C47 C 0.7245(15) 0.0508(14) 0.2067(3) 0.085(4) Uani 1 1 d . . .
H47A H 0.7594 -0.0028 0.1868 0.060 Uiso 1 1 calc R . .
C48 C 0.5817(13) 0.1072(12) 0.2184(3) 0.072(3) Uani 1 1 d . . .
H48A H 0.5205 0.0916 0.2058 0.060 Uiso 1 1 calc R . .
C49 C 0.2476(12) 0.1999(12) 0.2306(3) 0.067(3) Uani 1 1 d . . .
C50 C 0.2485(13) 0.0819(13) 0.2328(4) 0.082(4) Uani 1 1 d . . .
H50A H 0.2874 0.0281 0.2514 0.060 Uiso 1 1 calc R . .
C51 C 0.1917(16) 0.0432(17) 0.2076(4) 0.105(5) Uani 1 1 d . . .
H51A H 0.1918 -0.0368 0.2090 0.060 Uiso 1 1 calc R . .
C52 C 0.1352(14) 0.122(2) 0.1804(4) 0.103(5) Uani 1 1 d . . .
H52A H 0.0948 0.0976 0.1635 0.060 Uiso 1 1 calc R . .
C53 C 0.1382(15) 0.2387(18) 0.1782(4) 0.098(5) Uani 1 1 d . . .
H53A H 0.1030 0.2908 0.1591 0.060 Uiso 1 1 calc R . .
C54 C 0.1918(13) 0.2804(12) 0.2034(3) 0.074(3) Uani 1 1 d . . .
H54A H 0.1903 0.3610 0.2021 0.060 Uiso 1 1 calc R . .
As3 As 0.83160(13) 0.77399(11) 0.45736(3) 0.0627(3) Uani 1 1 d . . .
C55 C 0.7815(14) 0.9059(12) 0.4227(3) 0.073(3) Uani 1 1 d . . .
C56 C 0.8653(17) 0.8869(13) 0.3931(4) 0.101(5) Uani 1 1 d . . .
H56A H 0.9415 0.8062 0.3886 0.060 Uiso 1 1 calc R . .
C57 C 0.8434(19) 0.9823(17) 0.3687(5) 0.119(6) Uani 1 1 d . . .
H57A H 0.9064 0.9672 0.3487 0.060 Uiso 1 1 calc R . .
C58 C 0.733(2) 1.0944(18) 0.3740(5) 0.120(6) Uani 1 1 d . . .
H58A H 0.7180 1.1588 0.3576 0.060 Uiso 1 1 calc R . .
C59 C 0.638(2) 1.1187(13) 0.4039(5) 0.126(7) Uani 1 1 d . . .
H59A H 0.5588 1.1980 0.4075 0.060 Uiso 1 1 calc R . .
C60 C 0.6643(18) 1.0202(13) 0.4284(4) 0.113(6) Uani 1 1 d . . .
H60A H 0.6020 1.0331 0.4484 0.060 Uiso 1 1 calc R . .
C61 C 0.6743(13) 0.7439(11) 0.4740(3) 0.074(3) Uani 1 1 d . . .
C62 C 0.6690(15) 0.7005(14) 0.5071(4) 0.090(4) Uani 1 1 d . . .
H62A H 0.7354 0.6941 0.5220 0.060 Uiso 1 1 calc R . .
C63 C 0.5631(17) 0.6651(15) 0.5188(4) 0.102(5) Uani 1 1 d . . .
H63A H 0.5597 0.6336 0.5413 0.060 Uiso 1 1 calc R . .
C64 C 0.4654(17) 0.6773(15) 0.4968(5) 0.103(5) Uani 1 1 d . . .
H64A H 0.3934 0.6561 0.5045 0.060 Uiso 1 1 calc R . .
C65 C 0.4730(16) 0.7205(16) 0.4635(4) 0.105(5) Uani 1 1 d . . .
H65A H 0.4071 0.7269 0.4485 0.060 Uiso 1 1 calc R . .
C66 C 0.5759(14) 0.7545(14) 0.4521(3) 0.087(4) Uani 1 1 d . . .
H66A H 0.5795 0.7850 0.4294 0.060 Uiso 1 1 calc R . .
C67 C 0.8982(12) 0.8255(11) 0.4958(3) 0.064(3) Uani 1 1 d . . .
C68 C 1.0127(16) 0.7381(13) 0.5115(3) 0.087(4) Uani 1 1 d . . .
H68A H 1.0594 0.6524 0.5039 0.060 Uiso 1 1 calc R . .
C69 C 1.0568(17) 0.7822(18) 0.5393(4) 0.103(5) Uani 1 1 d . . .
H69A H 1.1358 0.7253 0.5499 0.060 Uiso 1 1 calc R . .
C70 C 0.988(2) 0.9043(18) 0.5509(4) 0.102(5) Uani 1 1 d . . .
H70A H 1.0181 0.9316 0.5696 0.060 Uiso 1 1 calc R . .
C71 C 0.8735(19) 0.9883(17) 0.5356(4) 0.105(5) Uani 1 1 d . . .
H71A H 0.8253 1.0729 0.5441 0.060 Uiso 1 1 calc R . .
C72 C 0.8286(15) 0.9513(13) 0.5083(3) 0.089(4) Uani 1 1 d . . .
H72A H 0.7506 1.0106 0.4978 0.060 Uiso 1 1 calc R . .
C73 C 0.9770(12) 0.6199(10) 0.4368(3) 0.064(3) Uani 1 1 d . . .
C74 C 0.9447(13) 0.5270(11) 0.4245(3) 0.070(3) Uani 1 1 d . . .
H74A H 0.8535 0.5359 0.4279 0.060 Uiso 1 1 calc R . .
C75 C 1.0522(17) 0.4205(12) 0.4070(4) 0.095(5) Uani 1 1 d . . .
H75A H 1.0324 0.3551 0.3998 0.060 Uiso 1 1 calc R . .
C76 C 1.1855(16) 0.4062(13) 0.3996(4) 0.089(4) Uani 1 1 d . . .
H76A H 1.2547 0.3356 0.3867 0.060 Uiso 1 1 calc R . .
C77 C 1.2129(15) 0.5018(13) 0.4123(3) 0.085(4) Uani 1 1 d . . .
H77A H 1.3041 0.4931 0.4089 0.060 Uiso 1 1 calc R . .
C78 C 1.1123(14) 0.6060(11) 0.4291(3) 0.074(3) Uani 1 1 d . . .
H78A H 1.1333 0.6711 0.4358 0.060 Uiso 1 1 calc R . .
N1 N 0.6243(12) 0.6538(11) 0.2325(3) 0.094(3) Uani 1 1 d . . .
H1A H 0.5433 0.6940 0.2471 0.060 Uiso 1 1 calc R . .
C79 C 0.597(2) 0.7268(18) 0.1995(5) 0.128(6) Uiso 1 1 d . . .
H79A H 0.5639 0.8175 0.2049 0.060 Uiso 1 1 calc R . .
H79B H 0.6834 0.6973 0.1841 0.060 Uiso 1 1 calc R . .
C80 C 0.491(2) 0.7112(19) 0.1814(5) 0.157(8) Uiso 1 1 d . . .
H80A H 0.4764 0.7595 0.1600 0.060 Uiso 1 1 calc R . .
H80B H 0.4046 0.7422 0.1963 0.060 Uiso 1 1 calc R . .
H80C H 0.5239 0.6217 0.1757 0.060 Uiso 1 1 calc R . .
C81 C 0.7333(18) 0.6709(15) 0.2505(5) 0.115(5) Uiso 1 1 d . . .
H81A H 0.7620 0.6095 0.2694 0.060 Uiso 1 1 calc R . .
H81B H 0.8150 0.6497 0.2336 0.060 Uiso 1 1 calc R . .
C82 C 0.6900(18) 0.7995(15) 0.2653(4) 0.121(6) Uiso 1 1 d . . .
H82A H 0.7670 0.8010 0.2759 0.060 Uiso 1 1 calc R . .
H82B H 0.6117 0.8206 0.2828 0.060 Uiso 1 1 calc R . .
H82D H 0.6629 0.8615 0.2469 0.060 Uiso 1 1 calc R . .
C83 C 0.647(2) 0.5175(17) 0.2293(5) 0.136(6) Uiso 1 1 d . . .
H83A H 0.6464 0.4821 0.2526 0.060 Uiso 1 1 calc R . .
H83C H 0.5716 0.5155 0.2177 0.060 Uiso 1 1 calc R . .
C84 C 0.777(2) 0.442(2) 0.2097(6) 0.200(10) Uiso 1 1 d . . .
H84D H 0.7911 0.3543 0.2081 0.060 Uiso 1 1 calc R . .
H84A H 0.8523 0.4434 0.2212 0.060 Uiso 1 1 calc R . .
H84B H 0.7773 0.4753 0.1864 0.060 Uiso 1 1 calc R . .

loop_
  _atom_site_aniso_label
  _atom_site_aniso_U_11
  _atom_site_aniso_U_22
  _atom_site_aniso_U_33
  _atom_site_aniso_U_23
  _atom_site_aniso_U_13
  _atom_site_aniso_U_12
Re1 0.0449(2) 0.0487(2) 0.0612(3) 0.00381(19) 0.0014(2) -0.01828(19)
Cl1 0.0555(16) 0.0623(16) 0.096(2) 0.0042(15) -0.0255(16) -0.0214(14)
Cl2 0.077(3) 0.264(7) 0.289(8) 0.165(6) 0.043(4) -0.031(4)
Cl3 0.232(6) 0.067(2) 0.155(4) -0.024(2) -0.121(4) 0.000(3)
Cl4 0.195(5) 0.063(2) 0.286(7) -0.012(3) -0.163(5) -0.029(3)
O1 0.054(5) 0.125(7) 0.112(7) 0.064(6) -0.008(5) -0.028(5)
O2 0.064(5) 0.061(4) 0.055(5) 0.010(4) 0.008(4) -0.005(4)
C1 0.050(8) 0.151(14) 0.118(12) 0.082(11) 0.019(8) -0.001(9)
C2 0.050(7) 0.113(11) 0.080(9) 0.013(8) 0.003(7) -0.003(7)
C3 0.061(7) 0.070(7) 0.061(7) 0.025(6) -0.020(6) -0.010(6)
O3 0.068(7) 0.245(15) 0.178(12) 0.134(11) 0.022(7) -0.028(8)
Re2 0.0634(3) 0.0661(3) 0.0586(3) 0.0043(2) -0.0087(2) -0.0216(2)
Cl5 0.111(3) 0.092(2) 0.084(2) 0.0321(19) -0.042(2) -0.048(2)
Cl6 0.067(2) 0.099(3) 0.110(3) -0.004(2) 0.002(2) -0.0105(19)
Cl7 0.082(2) 0.086(2) 0.080(2) -0.0133(17) -0.0033(17) -0.0366(18)
Cl8 0.100(3) 0.103(2) 0.088(2) 0.0130(19) -0.015(2) -0.059(2)
O5 0.077(6) 0.079(5) 0.059(5) 0.000(4) -0.005(4) -0.025(5)
O6 0.063(5) 0.091(6) 0.055(5) 0.013(4) 0.001(4) -0.024(5)
C4 0.074(8) 0.061(7) 0.068(8) -0.001(6) -0.001(7) -0.035(7)
C5 0.065(8) 0.059(7) 0.085(9) -0.002(6) -0.002(7) -0.016(6)
C6 0.070(8) 0.077(8) 0.057(7) -0.005(6) -0.011(7) -0.027(7)
O7 0.086(6) 0.073(5) 0.077(6) -0.019(5) 0.028(5) -0.037(5)
O8 0.081(6) 0.099(6) 0.070(6) 0.011(5) -0.006(5) -0.030(5)
As1 0.0486(6) 0.0495(6) 0.0446(6) 0.0027(4) -0.0055(5) -0.0227(5)
C7 0.050(6) 0.066(7) 0.042(6) -0.001(5) -0.009(5) -0.023(5)
C8 0.067(7) 0.062(7) 0.058(7) -0.018(6) -0.005(6) -0.017(6)
C9 0.051(7) 0.080(8) 0.086(9) 0.001(7) -0.017(7) -0.015(6)
C10 0.062(8) 0.097(10) 0.066(8) 0.000(7) -0.020(6) -0.029(7)
C11 0.079(9) 0.095(10) 0.056(7) -0.009(7) -0.018(7) -0.037(8)
C12 0.080(8) 0.060(7) 0.071(8) -0.002(6) -0.023(7) -0.021(6)
C13 0.053(6) 0.061(6) 0.038(5) 0.003(5) -0.008(5) -0.029(5)
C14 0.073(7) 0.062(6) 0.036(5) 0.000(5) 0.002(5) -0.033(6)
C15 0.083(9) 0.068(7) 0.066(8) 0.005(6) -0.003(7) -0.039(7)
C16 0.093(10) 0.088(9) 0.068(8) -0.012(7) -0.012(7) -0.052(8)
C17 0.091(9) 0.107(10) 0.041(6) 0.001(7) -0.015(6) -0.051(8)
C18 0.077(8) 0.059(6) 0.058(7) 0.013(5) -0.024(6) -0.035(6)
C19 0.046(6) 0.059(6) 0.040(5) 0.002(5) -0.001(5) -0.025(5)
C20 0.048(6) 0.055(6) 0.056(6) -0.003(5) -0.002(5) -0.019(5)
C21 0.071(8) 0.067(7) 0.094(9) 0.004(7) 0.008(7) -0.047(7)
C22 0.094(10) 0.059(7) 0.059(7) 0.011(6) 0.011(7) -0.030(7)
C23 0.063(7) 0.053(6) 0.067(7) 0.013(5) -0.009(6) -0.017(6)
C24 0.065(7) 0.061(6) 0.066(7) 0.012(6) -0.013(6) -0.033(6)
C25 0.045(5) 0.058(6) 0.045(6) 0.002(5) -0.012(4) -0.029(5)
C26 0.067(8) 0.056(7) 0.081(8) -0.005(6) 0.010(7) -0.023(6)
C27 0.068(8) 0.081(8) 0.062(7) -0.001(6) 0.010(6) -0.038(7)
C28 0.052(7) 0.098(10) 0.049(7) 0.003(6) -0.011(5) -0.024(7)
C29 0.049(7) 0.067(7) 0.095(9) -0.009(7) 0.000(7) -0.015(6)
C30 0.056(7) 0.060(7) 0.063(7) 0.005(5) 0.000(6) -0.030(6)
As2 0.0651(7) 0.0674(7) 0.0503(6) 0.0011(5) -0.0059(5) -0.0309(6)
C31 0.058(7) 0.075(7) 0.056(7) -0.004(6) -0.001(6) -0.033(6)
C32 0.099(11) 0.094(10) 0.069(9) 0.002(7) 0.000(8) -0.044(8)
C33 0.142(16) 0.154(16) 0.072(10) -0.011(10) 0.022(10) -0.102(14)
C34 0.23(2) 0.105(12) 0.055(9) 0.020(8) 0.003(12) -0.104(16)
C35 0.160(18) 0.092(11) 0.091(12) 0.035(9) -0.033(12) -0.053(12)
C36 0.095(10) 0.082(9) 0.067(8) 0.006(7) -0.006(8) -0.032(8)
C37 0.064(7) 0.068(7) 0.057(7) 0.001(6) -0.014(6) -0.030(6)
C38 0.086(9) 0.084(9) 0.066(8) -0.008(7) 0.004(7) -0.041(8)
C39 0.083(9) 0.081(9) 0.088(10) -0.031(8) 0.015(8) -0.035(8)
C40 0.092(11) 0.077(9) 0.111(13) -0.002(9) -0.016(10) -0.034(8)
C41 0.114(12) 0.074(9) 0.080(9) 0.017(7) -0.013(9) -0.056(9)
C42 0.074(8) 0.078(8) 0.064(8) -0.009(6) 0.009(6) -0.035(7)
C43 0.073(8) 0.073(7) 0.045(6) -0.001(5) -0.003(6) -0.033(6)
C44 0.073(9) 0.083(9) 0.083(9) -0.029(7) 0.002(7) -0.027(7)
C45 0.070(10) 0.135(14) 0.140(15) -0.026(12) -0.005(10) -0.054(10)
C46 0.084(10) 0.107(11) 0.093(11) -0.017(9) 0.024(9) -0.034(9)
C47 0.080(9) 0.109(11) 0.063(8) -0.008(7) 0.000(7) -0.042(9)
C48 0.075(8) 0.105(9) 0.044(6) -0.001(6) -0.002(6) -0.047(8)
C49 0.073(8) 0.081(8) 0.056(7) -0.008(6) -0.003(6) -0.043(7)
C50 0.080(9) 0.083(9) 0.086(9) 0.002(7) -0.027(7) -0.036(7)
C51 0.100(12) 0.123(13) 0.112(13) -0.044(11) 0.008(10) -0.069(11)
C52 0.067(9) 0.178(18) 0.075(10) -0.018(11) -0.020(8) -0.061(11)
C53 0.093(11) 0.149(15) 0.068(9) 0.016(9) -0.022(8) -0.066(11)
C54 0.088(9) 0.081(8) 0.054(7) 0.003(6) -0.013(7) -0.038(7)
As3 0.0698(8) 0.0562(6) 0.0564(7) 0.0017(5) -0.0120(6) -0.0224(6)
C55 0.092(9) 0.076(8) 0.050(7) 0.006(6) -0.023(7) -0.033(7)
C56 0.118(12) 0.071(8) 0.092(11) 0.035(8) -0.007(9) -0.025(8)
C57 0.106(13) 0.121(14) 0.107(13) 0.043(11) -0.017(10) -0.031(11)
C58 0.147(17) 0.107(13) 0.103(13) 0.048(11) -0.051(13) -0.051(13)
C59 0.168(18) 0.050(8) 0.115(14) 0.007(9) -0.049(13) -0.004(9)
C60 0.141(14) 0.076(9) 0.072(9) 0.001(8) -0.012(9) -0.004(10)
C61 0.085(9) 0.062(7) 0.056(7) -0.007(6) -0.010(7) -0.016(6)
C62 0.085(10) 0.118(11) 0.077(10) 0.007(8) -0.021(8) -0.052(9)
C63 0.107(12) 0.129(13) 0.071(9) 0.016(9) 0.008(9) -0.058(11)
C64 0.080(10) 0.116(12) 0.115(14) -0.008(10) 0.003(10) -0.048(9)
C65 0.080(11) 0.140(14) 0.089(12) -0.021(10) -0.012(9) -0.041(10)
C66 0.075(9) 0.127(12) 0.057(8) 0.005(7) -0.016(7) -0.042(9)
C67 0.075(8) 0.076(8) 0.047(6) 0.007(6) -0.012(6) -0.038(7)
C68 0.122(12) 0.087(9) 0.061(8) 0.012(7) -0.025(8) -0.051(9)
C69 0.106(12) 0.137(14) 0.068(9) 0.040(10) -0.040(9) -0.052(11)
C70 0.157(17) 0.127(14) 0.059(9) -0.010(10) 0.008(10) -0.099(14)
C71 0.133(15) 0.109(12) 0.066(10) -0.008(9) -0.009(10) -0.050(11)
C72 0.095(10) 0.086(9) 0.074(9) -0.021(7) -0.022(8) -0.027(8)
C73 0.067(8) 0.054(6) 0.070(8) 0.021(6) -0.011(6) -0.027(6)
C74 0.076(8) 0.068(7) 0.070(8) -0.006(6) -0.002(6) -0.035(7)
C75 0.119(13) 0.061(8) 0.098(11) -0.022(7) 0.018(9) -0.038(8)
C76 0.091(11) 0.063(8) 0.083(10) -0.007(7) 0.017(8) -0.014(8)
C77 0.078(9) 0.081(9) 0.079(9) 0.021(8) 0.013(7) -0.025(8)
C78 0.097(10) 0.061(7) 0.079(9) 0.003(6) -0.005(8) -0.049(7)
N1 0.087(8) 0.101(8) 0.093(8) 0.002(7) 0.018(7) -0.047(7)

_geom_special_details
;
  All esds (except the esd in the dihedral angle between two l.s. planes)
  are estimated using the full covariance matrix.  The cell esds are taken
  into account individually in the estimation of esds in distances, angles
  and torsion angles; correlations between esds in cell parameters are only
  used when they are defined by crystal symmetry.  An approximate (isotropic)
  treatment of cell esds is used for estimating esds involving l.s. planes.
;

loop_
  _geom_bond_atom_site_label_1
  _geom_bond_atom_site_label_2
  _geom_bond_distance
  _geom_bond_site_symmetry_2
  _geom_bond_publ_flag
Re1 O1 1.963(8) . ?
Re1 O2 2.014(7) . ?
Re1 Cl3 2.302(4) . ?
Re1 Cl2 2.306(4) . ?
Re1 Cl4 2.320(4) . ?
Re1 Cl1 2.336(3) . ?
O1 C1 1.303(15) . ?
O2 C3 1.268(13) . ?
C1 O3 1.229(16) . ?
C1 C2 1.448(18) . ?
C2 C3 1.502(16) . ?
C3 O4 1.211(12) . ?
Re2 O5 2.015(8) . ?
Re2 O6 2.017(7) . ?
Re2 Cl5 2.328(3) . ?
Re2 Cl6 2.341(3) . ?
Re2 Cl8 2.357(3) . ?
Re2 Cl7 2.366(3) . ?
O5 C4 1.276(14) . ?
O6 C6 1.321(13) . ?
C4 O7 1.198(13) . ?
C4 C5 1.502(16) . ?
C5 C6 1.499(16) . ?
C6 O8 1.214(13) . ?
As1 C19 1.911(10) . ?
As1 C7 1.915(10) . ?
As1 C25 1.916(10) . ?
As1 C13 1.921(9) . ?
C7 C8 1.374(14) . ?
C7 C12 1.377(14) . ?
C8 C9 1.400(15) . ?
C9 C10 1.371(16) . ?
C10 C11 1.345(16) . ?
C11 C12 1.377(15) . ?
C13 C14 1.372(13) . ?
C13 C18 1.375(13) . ?
C14 C15 1.364(14) . ?
C15 C16 1.348(16) . ?
C16 C17 1.355(16) . ?
C17 C18 1.372(15) . ?
C19 C24 1.354(13) . ?
C19 C20 1.393(13) . ?
C20 C21 1.384(14) . ?
C21 C22 1.369(16) . ?
C22 C23 1.351(16) . ?
C23 C24 1.389(14) . ?
C25 C26 1.351(14) . ?
C25 C30 1.378(13) . ?
C26 C27 1.381(15) . ?
C27 C28 1.358(15) . ?
C28 C29 1.366(16) . ?
C29 C30 1.385(15) . ?
As2 C31 1.909(11) . ?
As2 C43 1.913(12) . ?
As2 C49 1.916(11) . ?
As2 C37 1.917(11) . ?
C31 C36 1.353(16) . ?
C31 C32 1.371(16) . ?
C32 C33 1.354(19) . ?
C33 C34 1.38(2) . ?
C34 C35 1.38(2) . ?
C35 C36 1.393(18) . ?
C37 C42 1.362(15) . ?
C37 C38 1.386(16) . ?
C38 C39 1.389(17) . ?
C39 C40 1.342(18) . ?
C40 C41 1.330(18) . ?
C41 C42 1.380(16) . ?
C43 C44 1.362(16) . ?
C43 C48 1.368(15) . ?
C44 C45 1.408(18) . ?
C45 C46 1.364(19) . ?
C46 C47 1.317(18) . ?
C47 C48 1.392(16) . ?
C49 C50 1.368(16) . ?
C49 C54 1.369(15) . ?
C50 C51 1.374(18) . ?
C51 C52 1.36(2) . ?
C52 C53 1.37(2) . ?
C53 C54 1.370(17) . ?
As3 C73 1.888(11) . ?
As3 C67 1.913(11) . ?
As3 C61 1.915(14) . ?
As3 C55 1.918(12) . ?
C55 C56 1.327(18) . ?
C55 C60 1.358(18) . ?
C56 C57 1.379(18) . ?
C57 C58 1.31(2) . ?
C58 C59 1.39(2) . ?
C59 C60 1.402(19) . ?
C61 C62 1.349(17) . ?
C61 C66 1.370(16) . ?
C62 C63 1.401(19) . ?
C63 C64 1.36(2) . ?
C64 C65 1.36(2) . ?
C65 C66 1.359(19) . ?
C67 C68 1.372(16) . ?
C67 C72 1.381(16) . ?
C68 C69 1.400(18) . ?
C69 C70 1.33(2) . ?
C70 C71 1.35(2) . ?
C71 C72 1.347(18) . ?
C73 C74 1.380(15) . ?
C73 C78 1.383(16) . ?
C74 C75 1.382(16) . ?
C75 C76 1.360(19) . ?
C76 C77 1.380(18) . ?
C77 C78 1.329(16) . ?
N1 C79 1.477(18) . ?
N1 C83 1.497(19) . ?
N1 C81 1.499(18) . ?
C79 C80 1.46(2) . ?
C81 C82 1.462(19) . ?
C83 C84 1.41(2) . ?

loop_
  _geom_angle_atom_site_label_1
  _geom_angle_atom_site_label_2
  _geom_angle_atom_site_label_3
  _geom_angle
  _geom_angle_site_symmetry_1
  _geom_angle_site_symmetry_3
  _geom_angle_publ_flag
O1 Re1 O2 86.6(3) . . ?
O1 Re1 Cl3 89.0(4) . . ?
O2 Re1 Cl3 88.8(2) . . ?
O1 Re1 Cl2 176.3(3) . . ?
O2 Re1 Cl2 89.8(3) . . ?
Cl3 Re1 Cl2 90.3(3) . . ?
O1 Re1 Cl4 90.3(4) . . ?
O2 Re1 Cl4 89.8(2) . . ?
Cl3 Re1 Cl4 178.39(16) . . ?
Cl2 Re1 Cl4 90.3(3) . . ?
O1 Re1 Cl1 91.0(2) . . ?
O2 Re1 Cl1 177.6(2) . . ?
Cl3 Re1 Cl1 91.58(12) . . ?
Cl2 Re1 Cl1 92.63(17) . . ?
Cl4 Re1 Cl1 89.87(13) . . ?
C1 O1 Re1 128.4(9) . . ?
C3 O2 Re1 128.9(7) . . ?
O3 C1 O1 120.6(14) . . ?
O3 C1 C2 120.1(13) . . ?
O1 C1 C2 118.9(12) . . ?
C1 C2 C3 119.1(12) . . ?
O4 C3 O2 123.4(11) . . ?
O4 C3 C2 119.1(11) . . ?
O2 C3 C2 117.4(9) . . ?
O5 Re2 O6 86.8(3) . . ?
O5 Re2 Cl5 88.6(2) . . ?
O6 Re2 Cl5 175.4(2) . . ?
O5 Re2 Cl6 178.2(3) . . ?
O6 Re2 Cl6 91.6(2) . . ?
Cl5 Re2 Cl6 93.09(14) . . ?
O5 Re2 Cl8 88.2(3) . . ?
O6 Re2 Cl8 87.2(3) . . ?
Cl5 Re2 Cl8 92.88(12) . . ?
Cl6 Re2 Cl8 90.90(14) . . ?
O5 Re2 Cl7 90.1(3) . . ?
O6 Re2 Cl7 88.6(3) . . ?
Cl5 Re2 Cl7 91.18(12) . . ?
Cl6 Re2 Cl7 90.63(13) . . ?
Cl8 Re2 Cl7 175.58(12) . . ?
C4 O5 Re2 132.5(8) . . ?
C6 O6 Re2 129.8(8) . . ?
O7 C4 O5 123.6(12) . . ?
O7 C4 C5 119.5(12) . . ?
O5 C4 C5 117.0(11) . . ?
C6 C5 C4 122.2(11) . . ?
O8 C6 O6 119.2(12) . . ?
O8 C6 C5 122.9(12) . . ?
O6 C6 C5 117.9(11) . . ?
C19 As1 C7 110.1(4) . . ?
C19 As1 C25 108.1(4) . . ?
C7 As1 C25 107.4(4) . . ?
C19 As1 C13 108.5(4) . . ?
C7 As1 C13 110.4(4) . . ?
C25 As1 C13 112.2(4) . . ?
C8 C7 C12 119.3(10) . . ?
C8 C7 As1 121.4(8) . . ?
C12 C7 As1 119.3(8) . . ?
C7 C8 C9 119.8(10) . . ?
C10 C9 C8 119.2(11) . . ?
C11 C10 C9 121.2(11) . . ?
C10 C11 C12 119.8(12) . . ?
C11 C12 C7 120.7(11) . . ?
C14 C13 C18 120.9(9) . . ?
C14 C13 As1 119.7(7) . . ?
C18 C13 As1 119.3(8) . . ?
C15 C14 C13 117.9(10) . . ?
C16 C15 C14 121.9(11) . . ?
C15 C16 C17 120.0(12) . . ?
C16 C17 C18 120.2(11) . . ?
C17 C18 C13 119.0(10) . . ?
C24 C19 C20 119.6(9) . . ?
C24 C19 As1 120.1(8) . . ?
C20 C19 As1 120.2(7) . . ?
C21 C20 C19 119.5(10) . . ?
C22 C21 C20 119.8(11) . . ?
C23 C22 C21 120.7(11) . . ?
C22 C23 C24 120.0(11) . . ?
C19 C24 C23 120.4(11) . . ?
C26 C25 C30 120.7(10) . . ?
C26 C25 As1 119.2(8) . . ?
C30 C25 As1 119.8(7) . . ?
C25 C26 C27 119.6(11) . . ?
C28 C27 C26 121.1(12) . . ?
C27 C28 C29 119.0(11) . . ?
C28 C29 C30 121.0(11) . . ?
C25 C30 C29 118.7(10) . . ?
C31 As2 C43 108.9(5) . . ?
C31 As2 C49 107.6(5) . . ?
C43 As2 C49 107.0(5) . . ?
C31 As2 C37 111.0(5) . . ?
C43 As2 C37 113.1(5) . . ?
C49 As2 C37 108.9(5) . . ?
C36 C31 C32 118.9(12) . . ?
C36 C31 As2 121.8(9) . . ?
C32 C31 As2 119.2(10) . . ?
C33 C32 C31 121.0(15) . . ?
C32 C33 C34 120.6(17) . . ?
C33 C34 C35 119.2(15) . . ?
C34 C35 C36 118.6(16) . . ?
C31 C36 C35 121.5(15) . . ?
C42 C37 C38 119.9(11) . . ?
C42 C37 As2 119.4(9) . . ?
C38 C37 As2 119.7(9) . . ?
C37 C38 C39 119.3(12) . . ?
C40 C39 C38 118.3(13) . . ?
C41 C40 C39 123.5(14) . . ?
C40 C41 C42 119.1(13) . . ?
C37 C42 C41 119.7(12) . . ?
C44 C43 C48 119.9(11) . . ?
C44 C43 As2 120.4(9) . . ?
C48 C43 As2 119.7(9) . . ?
C43 C44 C45 118.0(12) . . ?
C46 C45 C44 119.8(14) . . ?
C47 C46 C45 122.4(15) . . ?
C46 C47 C48 118.2(13) . . ?
C43 C48 C47 121.4(12) . . ?
C50 C49 C54 121.2(11) . . ?
C50 C49 As2 119.2(10) . . ?
C54 C49 As2 119.6(9) . . ?
C49 C50 C51 119.8(14) . . ?
C52 C51 C50 119.8(16) . . ?
C51 C52 C53 119.5(14) . . ?
C52 C53 C54 121.7(14) . . ?
C49 C54 C53 118.0(13) . . ?
C73 As3 C67 109.1(5) . . ?
C73 As3 C61 108.9(5) . . ?
C67 As3 C61 109.9(5) . . ?
C73 As3 C55 108.8(5) . . ?
C67 As3 C55 108.9(5) . . ?
C61 As3 C55 111.2(6) . . ?
C56 C55 C60 119.3(13) . . ?
C56 C55 As3 119.4(10) . . ?
C60 C55 As3 121.3(11) . . ?
C55 C56 C57 122.4(15) . . ?
C58 C57 C56 119.4(18) . . ?
C57 C58 C59 121.1(16) . . ?
C58 C59 C60 118.1(15) . . ?
C55 C60 C59 119.7(16) . . ?
C62 C61 C66 120.3(14) . . ?
C62 C61 As3 118.4(10) . . ?
C66 C61 As3 121.1(10) . . ?
C61 C62 C63 119.7(14) . . ?
C64 C63 C62 119.3(14) . . ?
C65 C64 C63 120.1(16) . . ?
C66 C65 C64 120.6(15) . . ?
C65 C66 C61 120.0(14) . . ?
C68 C67 C72 119.8(11) . . ?
C68 C67 As3 120.7(9) . . ?
C72 C67 As3 119.5(9) . . ?
C67 C68 C69 117.8(13) . . ?
C70 C69 C68 121.2(15) . . ?
C69 C70 C71 120.1(16) . . ?
C72 C71 C70 120.9(16) . . ?
C71 C72 C67 120.1(14) . . ?
C74 C73 C78 118.7(11) . . ?
C74 C73 As3 119.6(9) . . ?
C78 C73 As3 121.1(9) . . ?
C73 C74 C75 117.9(12) . . ?
C76 C75 C74 123.4(13) . . ?
C75 C76 C77 116.7(13) . . ?
C78 C77 C76 121.6(14) . . ?
C77 C78 C73 121.5(12) . . ?
C79 N1 C83 114.9(13) . . ?
C79 N1 C81 110.5(12) . . ?
C83 N1 C81 115.1(13) . . ?
C80 C79 N1 111.7(16) . . ?
C82 C81 N1 115.8(14) . . ?
C84 C83 N1 110.5(16) . . ?

_diffrn_measured_fraction_theta_max    1.000
_diffrn_reflns_theta_full              25.05
_diffrn_measured_fraction_theta_full   1.000
_refine_diff_density_max    0.896
_refine_diff_density_min   -0.675
_refine_diff_density_rms    0.111


# END OF COMPOUND 1a


data_comp1b

_audit_creation_method            SHELXL-97
_chemical_name_systematic
;
  ?
;
_chemical_name_common             ?
_chemical_melting_point           ?
_chemical_formula_moiety         
  'C24 H20 As, C6 H16 N, C3 H2 Cl4 O4 Re'
_chemical_formula_sum
  'C33 H38 As Cl4 N O4 Re'
_chemical_formula_weight          915.56

loop_
  _atom_type_symbol
  _atom_type_description
  _atom_type_scat_dispersion_real
  _atom_type_scat_dispersion_imag
  _atom_type_scat_source
  'C'  'C'   0.0033   0.0016
  'International Tables Vol C Tables 4.2.6.8 and 6.1.1.4'
  'H'  'H'   0.0000   0.0000
  'International Tables Vol C Tables 4.2.6.8 and 6.1.1.4'
  'N'  'N'   0.0061   0.0033
  'International Tables Vol C Tables 4.2.6.8 and 6.1.1.4'
  'O'  'O'   0.0106   0.0060
  'International Tables Vol C Tables 4.2.6.8 and 6.1.1.4'
  'Cl'  'Cl'   0.1484   0.1585
  'International Tables Vol C Tables 4.2.6.8 and 6.1.1.4'
  'As'  'As'   0.0499   2.0058
  'International Tables Vol C Tables 4.2.6.8 and 6.1.1.4'
  'Re'  'Re'  -1.0185   7.2310
  'International Tables Vol C Tables 4.2.6.8 and 6.1.1.4'

_symmetry_cell_setting            Monoclinic
_symmetry_space_group_name_H-M    'P 1 21/n 1'

loop_
  _symmetry_equiv_pos_as_xyz
  'x, y, z'
  '-x+1/2, y+1/2, -z+1/2'
  '-x, -y, -z'
  'x-1/2, -y-1/2, z-1/2'

_cell_length_a                    9.737(5)
_cell_length_b                    20.344(2)
_cell_length_c                    18.954(3)
_cell_angle_alpha                 90.00
_cell_angle_beta                  96.71(2)
_cell_angle_gamma                 90.00
_cell_volume                      3728.6(19)
_cell_formula_units_Z             4
_cell_measurement_temperature     273(2)
_cell_measurement_reflns_used     25
_cell_measurement_theta_min       12.56
_cell_measurement_theta_max       15.16

_exptl_crystal_description        prismatic
_exptl_crystal_colour             'light green'
_exptl_crystal_size_max           0.45
_exptl_crystal_size_mid           0.12
_exptl_crystal_size_min           0.10
_exptl_crystal_density_meas       ?
_exptl_crystal_density_diffrn     1.631
_exptl_crystal_density_method     'not measured'
_exptl_crystal_F_000              1804
_exptl_absorpt_coefficient_mu     4.461
_exptl_absorpt_correction_type    'psi-scan'
_exptl_absorpt_correction_T_min   0.2387
_exptl_absorpt_correction_T_max   0.6639
_exptl_absorpt_process_details    'MSC/AFC Diffractometer Software, 1993'

_exptl_special_details
;
  ?
;

_diffrn_ambient_temperature       273(2)
_diffrn_radiation_wavelength      0.71069
_diffrn_radiation_type            MoK\a
_diffrn_radiation_source          'fine-focus sealed tube'
_diffrn_radiation_monochromator   graphite
_diffrn_measurement_device_type   'Rigaku AFC-7S'
_diffrn_measurement_method        \q/2\q
_diffrn_detector_area_resol_mean  ?
_diffrn_standards_number          3
_diffrn_standards_interval_count  150
_diffrn_standards_interval_time   ?
_diffrn_standards_decay_%         0
_diffrn_reflns_number             8180
_diffrn_reflns_av_R_equivalents   0.0420
_diffrn_reflns_av_sigmaI/netI     0.1157
_diffrn_reflns_limit_h_min        -1
_diffrn_reflns_limit_h_max        11
_diffrn_reflns_limit_k_min        -19
_diffrn_reflns_limit_k_max        24
_diffrn_reflns_limit_l_min        -22
_diffrn_reflns_limit_l_max        22
_diffrn_reflns_theta_min          2.00
_diffrn_reflns_theta_max          25.52
_reflns_number_total              6925
_reflns_number_gt                 3206
_reflns_threshold_expression      >2sigma(I)

_computing_data_collection        'MSC/AFC Diffractometer Software, 1993'
_computing_cell_refinement        'MSC/AFC Diffractometer Software, 1993'
_computing_data_reduction         'MSC/AFC Diffractometer Software, 1993'
_computing_structure_solution     'SHELXS-97 (Sheldrick, 1990)'
_computing_structure_refinement   'SHELXL-97 (Sheldrick, 1997)'
_computing_molecular_graphics     'ZORTEP (Zsolnai & Pritzkow, 1995)'
_computing_publication_material  
'PLATON (Spek, 1990) and CSD (Allen & Kennard,1993)'


_refine_special_details
;
  Refinement of F^2^ against ALL reflections.  The weighted R-factor wR and
  goodness of fit S are based on F^2^, conventional R-factors R are based
  on F, with F set to zero for negative F^2^. The threshold expression of
  F^2^ > 2sigma(F^2^) is used only for calculating R-factors(gt) etc. and is
  not relevant to the choice of reflections for refinement.  R-factors based
  on F^2^ are statistically about twice as large as those based on F, and R-
  factors based on ALL data will be even larger.
;

_refine_ls_structure_factor_coef  Fsqd 
_refine_ls_matrix_type            full
_refine_ls_weighting_scheme       calc 
_refine_ls_weighting_details
  'calc w=1/[\s^2^(Fo^2^)+(0.1104P)^2^+0.0000P] where P=(Fo^2^+2Fc^2^)/3'
_atom_sites_solution_primary      direct
_atom_sites_solution_secondary    difmap
_atom_sites_solution_hydrogens    geom
_refine_ls_hydrogen_treatment     mixed
_refine_ls_extinction_method      none
_refine_ls_extinction_coef        ?
_refine_ls_number_reflns          6925
_refine_ls_number_parameters      397
_refine_ls_number_restraints      96
_refine_ls_R_factor_all           0.1575
_refine_ls_R_factor_gt            0.0573
_refine_ls_wR_factor_ref          0.1963
_refine_ls_wR_factor_gt           0.1513
_refine_ls_goodness_of_fit_ref    0.979
_refine_ls_restrained_S_all       0.986
_refine_ls_shift/su_max           0.001
_refine_ls_shift/su_mean          0.001

loop_
  _atom_site_label
  _atom_site_type_symbol
  _atom_site_fract_x
  _atom_site_fract_y
  _atom_site_fract_z
  _atom_site_U_iso_or_equiv
  _atom_site_adp_type
  _atom_site_occupancy
  _atom_site_symmetry_multiplicity
  _atom_site_calc_flag
  _atom_site_refinement_flags
  _atom_site_disorder_assembly
  _atom_site_disorder_group
Re1 Re 0.10897(5) 0.22730(2) 0.58452(3) 0.0629(2) Uani 1 1 d . . .
Cl1 Cl 0.2271(4) 0.32286(17) 0.55919(19) 0.0890(10) Uani 1 1 d . . .
Cl2 Cl -0.0730(4) 0.28414(15) 0.62663(19) 0.0821(9) Uani 1 1 d . . .
Cl3 Cl 0.2323(4) 0.22519(17) 0.69846(19) 0.0958(11) Uani 1 1 d . . .
Cl4 Cl -0.0030(4) 0.22677(19) 0.46681(18) 0.0934(11) Uani 1 1 d . . .
O1 O 0.0130(8) 0.1437(4) 0.6059(4) 0.066(2) Uani 1 1 d . . .
O2 O 0.2574(8) 0.1708(4) 0.5505(4) 0.080(2) Uani 1 1 d . . .
C1 C 0.0251(12) 0.0852(7) 0.5836(6) 0.068(3) Uani 1 1 d . . .
C2 C 0.1139(13) 0.0723(7) 0.5245(8) 0.098(5) Uani 1 1 d . . .
H2A H 0.0594 0.0822 0.4796 0.117 Uiso 1 1 calc R . .
H2B H 0.1358 0.0258 0.5245 0.117 Uiso 1 1 calc R . .
C3 C 0.2493(13) 0.1110(7) 0.5280(8) 0.090(4) Uani 1 1 d . . .
O3 O -0.0359(10) 0.0396(4) 0.6072(5) 0.092(3) Uani 1 1 d . . .
O4 O 0.3454(11) 0.0847(6) 0.5037(6) 0.119(3) Uani 1 1 d U . .
As1 As 0.32347(12) 0.00297(6) 0.16253(6) 0.0634(4) Uani 1 1 d . . .
C11 C 0.2199(12) 0.0672(6) 0.2070(6) 0.063(3) Uani 1 1 d . . .
C12 C 0.2413(14) 0.0742(7) 0.2806(7) 0.083(4) Uani 1 1 d . . .
H12 H 0.3096 0.0495 0.3069 0.100 Uiso 1 1 calc R . .
C13 C 0.1640(17) 0.1165(8) 0.3142(8) 0.097(5) Uani 1 1 d . . .
H13 H 0.1770 0.1199 0.3635 0.117 Uiso 1 1 calc R . .
C14 C 0.0630(16) 0.1556(8) 0.2738(10) 0.104(5) Uani 1 1 d . . .
H14 H 0.0104 0.1855 0.2961 0.124 Uiso 1 1 calc R . .
C15 C 0.0435(16) 0.1486(8) 0.2008(9) 0.098(4) Uani 1 1 d . . .
H15 H -0.0233 0.1735 0.1738 0.118 Uiso 1 1 calc R . .
C16 C 0.1224(13) 0.1050(5) 0.1685(7) 0.073(3) Uani 1 1 d . . .
H16 H 0.1096 0.1011 0.1193 0.087 Uiso 1 1 calc R . .
C21 C 0.3070(12) 0.0209(5) 0.0625(6) 0.065(3) Uani 1 1 d . . .
C22 C 0.2068(14) -0.0115(7) 0.0198(7) 0.092(4) Uani 1 1 d . . .
H22 H 0.1555 -0.0450 0.0375 0.110 Uiso 1 1 calc R . .
C23 C 0.1845(16) 0.0067(9) -0.0494(9) 0.106(5) Uani 1 1 d . . .
H23 H 0.1169 -0.0153 -0.0792 0.127 Uiso 1 1 calc R . .
C24 C 0.257(2) 0.0561(9) -0.0775(8) 0.104(5) Uani 1 1 d . . .
H24 H 0.2364 0.0694 -0.1245 0.125 Uiso 1 1 calc R . .
C25 C 0.3597(18) 0.0849(8) -0.0338(8) 0.103(5) Uani 1 1 d . . .
H25 H 0.4136 0.1173 -0.0517 0.123 Uiso 1 1 calc R . .
C26 C 0.3855(15) 0.0672(7) 0.0356(7) 0.086(4) Uani 1 1 d . . .
H26 H 0.4573 0.0871 0.0646 0.104 Uiso 1 1 calc R . .
C31 C 0.5102(11) 0.0071(6) 0.2059(7) 0.068(3) Uani 1 1 d . . .
C32 C 0.5777(13) 0.0666(6) 0.2081(7) 0.082(4) Uani 1 1 d . . .
H32 H 0.5319 0.1040 0.1896 0.098 Uiso 1 1 calc R . .
C33 C 0.7123(15) 0.0704(7) 0.2375(8) 0.098(5) Uani 1 1 d . . .
H33 H 0.7577 0.1106 0.2373 0.118 Uiso 1 1 calc R . .
C34 C 0.7831(14) 0.0172(7) 0.2674(7) 0.083(4) Uani 1 1 d . . .
H34 H 0.8750 0.0208 0.2868 0.099 Uiso 1 1 calc R . .
C35 C 0.7138(14) -0.0419(7) 0.2677(6) 0.082(4) Uani 1 1 d . . .
H35 H 0.7579 -0.0783 0.2898 0.098 Uiso 1 1 calc R . .
C36 C 0.5784(14) -0.0476(6) 0.2353(6) 0.074(3) Uani 1 1 d . . .
H36 H 0.5341 -0.0881 0.2335 0.088 Uiso 1 1 calc R . .
C41 C 0.2479(12) -0.0821(6) 0.1749(6) 0.065(3) Uani 1 1 d . . .
C42 C 0.2976(13) -0.1360(7) 0.1403(7) 0.081(4) Uani 1 1 d . . .
H42 H 0.3630 -0.1299 0.1088 0.097 Uiso 1 1 calc R . .
C43 C 0.2503(15) -0.1977(7) 0.1525(8) 0.091(4) Uani 1 1 d . . .
H43 H 0.2838 -0.2341 0.1301 0.110 Uiso 1 1 calc R . .
C44 C 0.1530(16) -0.2050(7) 0.1982(8) 0.094(4) Uani 1 1 d . . .
H44 H 0.1216 -0.2472 0.2066 0.112 Uiso 1 1 calc R . .
C45 C 0.0986(16) -0.1527(7) 0.2329(7) 0.091(4) Uani 1 1 d . . .
H45 H 0.0294 -0.1590 0.2621 0.110 Uiso 1 1 calc R . .
C46 C 0.1517(12) -0.0905(6) 0.2222(6) 0.070(3) Uani 1 1 d . . .
H46 H 0.1223 -0.0546 0.2468 0.083 Uiso 1 1 calc R . .
N1 N 0.5689(15) 0.1693(6) 0.5124(6) 0.140(4) Uani 1 1 d DU . .
H1 H 0.4973 0.1407 0.5137 0.168 Uiso 1 1 calc R . .
C51 C 0.5161(19) 0.2229(9) 0.4649(10) 0.153(5) Uani 1 1 d DU . .
H51A H 0.4980 0.2059 0.4169 0.184 Uiso 1 1 calc R . .
H51B H 0.4290 0.2381 0.4791 0.184 Uiso 1 1 calc R . .
C52 C 0.606(2) 0.2763(9) 0.4648(12) 0.184(8) Uani 1 1 d DU . .
H52A H 0.5639 0.3104 0.4348 0.276 Uiso 1 1 calc R . .
H52B H 0.6905 0.2624 0.4473 0.276 Uiso 1 1 calc R . .
H52C H 0.6272 0.2928 0.5124 0.276 Uiso 1 1 calc R . .
C53 C 0.6795(19) 0.1321(10) 0.4866(9) 0.160(5) Uani 1 1 d DU . .
H53A H 0.7575 0.1612 0.4838 0.192 Uiso 1 1 calc R . .
H53B H 0.7089 0.0982 0.5211 0.192 Uiso 1 1 calc R . .
C54 C 0.647(2) 0.1026(11) 0.4211(12) 0.200(8) Uani 1 1 d DU . .
H54A H 0.7258 0.0795 0.4081 0.300 Uiso 1 1 calc R . .
H54B H 0.6192 0.1357 0.3861 0.300 Uiso 1 1 calc R . .
H54C H 0.5718 0.0723 0.4235 0.300 Uiso 1 1 calc R . .
C55 C 0.603(2) 0.1931(10) 0.5849(9) 0.167(5) Uani 1 1 d DU . .
H55A H 0.6947 0.2122 0.5890 0.201 Uiso 1 1 calc R . .
H55B H 0.5387 0.2281 0.5930 0.201 Uiso 1 1 calc R . .
C56 C 0.600(3) 0.1470(12) 0.6378(10) 0.219(9) Uani 1 1 d DU . .
H56A H 0.6244 0.1674 0.6831 0.328 Uiso 1 1 calc R . .
H56B H 0.6638 0.1124 0.6311 0.328 Uiso 1 1 calc R . .
H56C H 0.5080 0.1291 0.6359 0.328 Uiso 1 1 calc R . .

loop_
  _atom_site_aniso_label
  _atom_site_aniso_U_11
  _atom_site_aniso_U_22
  _atom_site_aniso_U_33
  _atom_site_aniso_U_23
  _atom_site_aniso_U_13
  _atom_site_aniso_U_12
Re1 0.0509(3) 0.0661(3) 0.0725(4) -0.0030(2) 0.0110(2) -0.0143(2)
Cl1 0.078(2) 0.084(2) 0.104(2) 0.0123(19) 0.0081(19) -0.0280(19)
Cl2 0.074(2) 0.0691(19) 0.107(2) -0.0115(17) 0.0274(18) -0.0083(17)
Cl3 0.109(3) 0.088(2) 0.085(2) 0.0050(19) -0.011(2) -0.025(2)
Cl4 0.067(2) 0.136(3) 0.076(2) -0.002(2) 0.0066(17) -0.017(2)
O1 0.056(5) 0.063(5) 0.079(5) -0.020(4) 0.006(4) -0.010(4)
O2 0.046(5) 0.082(6) 0.109(7) -0.013(5) -0.001(4) -0.012(4)
C1 0.042(7) 0.079(9) 0.078(8) -0.004(7) -0.013(6) -0.023(7)
C2 0.069(9) 0.103(10) 0.125(11) -0.061(9) 0.028(8) -0.032(8)
C3 0.043(7) 0.104(11) 0.127(12) -0.049(9) 0.026(8) -0.017(8)
O3 0.093(7) 0.079(6) 0.105(7) -0.006(5) 0.010(6) -0.018(6)
O4 0.084(6) 0.127(7) 0.147(7) -0.046(6) 0.022(6) -0.007(6)
As1 0.0547(7) 0.0641(7) 0.0727(8) -0.0013(6) 0.0126(6) -0.0028(6)
C11 0.054(7) 0.072(8) 0.062(7) -0.011(6) 0.005(6) -0.012(6)
C12 0.075(9) 0.091(9) 0.083(10) -0.007(7) 0.005(8) 0.008(8)
C13 0.091(11) 0.115(12) 0.091(10) -0.027(9) 0.030(9) -0.015(10)
C14 0.070(10) 0.091(11) 0.154(16) -0.015(11) 0.029(11) -0.002(9)
C15 0.084(11) 0.108(12) 0.103(11) 0.009(10) 0.013(9) 0.002(9)
C16 0.067(8) 0.060(7) 0.092(9) -0.001(7) 0.018(7) 0.015(7)
C21 0.056(7) 0.060(7) 0.079(8) -0.010(6) 0.011(6) -0.004(6)
C22 0.079(10) 0.121(12) 0.075(10) 0.005(8) 0.008(8) -0.038(9)
C23 0.081(11) 0.137(14) 0.096(12) -0.019(11) -0.006(9) -0.027(11)
C24 0.130(15) 0.117(13) 0.070(10) 0.012(9) 0.029(10) 0.027(12)
C25 0.117(13) 0.118(12) 0.078(11) 0.002(9) 0.028(10) -0.018(11)
C26 0.097(11) 0.085(9) 0.080(10) -0.010(7) 0.021(8) -0.020(8)
C31 0.043(7) 0.073(8) 0.088(8) 0.005(7) 0.018(6) -0.010(6)
C32 0.059(8) 0.076(9) 0.103(10) 0.021(7) -0.021(7) 0.000(7)
C33 0.075(10) 0.081(10) 0.136(13) 0.018(9) 0.002(9) -0.005(8)
C34 0.061(8) 0.084(10) 0.101(10) 0.006(8) -0.002(7) -0.004(8)
C35 0.081(10) 0.091(10) 0.072(8) 0.016(7) 0.007(7) 0.033(9)
C36 0.085(10) 0.069(8) 0.064(7) 0.010(6) -0.002(7) 0.008(7)
C41 0.058(7) 0.066(7) 0.074(7) 0.007(6) 0.019(6) -0.004(6)
C42 0.072(9) 0.089(9) 0.087(9) -0.006(8) 0.035(7) -0.016(8)
C43 0.100(12) 0.068(8) 0.108(11) 0.002(8) 0.020(10) -0.025(8)
C44 0.093(11) 0.076(9) 0.110(11) 0.003(8) 0.006(10) -0.029(9)
C45 0.104(12) 0.092(10) 0.082(9) 0.001(8) 0.027(8) -0.017(9)
C46 0.068(8) 0.074(8) 0.070(8) -0.011(6) 0.022(6) -0.003(7)
N1 0.134(6) 0.154(6) 0.135(6) 0.007(5) 0.028(5) -0.019(5)
C51 0.143(8) 0.157(8) 0.160(8) 0.012(7) 0.021(7) -0.016(7)
C52 0.172(11) 0.185(11) 0.194(11) 0.010(8) 0.012(8) -0.017(8)
C53 0.144(8) 0.171(8) 0.166(8) 0.009(7) 0.022(7) -0.010(7)
C54 0.191(11) 0.211(11) 0.202(11) -0.015(9) 0.037(9) 0.010(9)
C55 0.165(8) 0.178(8) 0.158(8) 0.008(7) 0.012(7) -0.029(7)
C56 0.211(11) 0.227(12) 0.211(11) 0.016(9) -0.002(9) -0.016(9)

_geom_special_details
;
  All esds (except the esd in the dihedral angle between two l.s. planes)
  are estimated using the full covariance matrix.  The cell esds are taken
  into account individually in the estimation of esds in distances, angles
  and torsion angles; correlations between esds in cell parameters are only
  used when they are defined by crystal symmetry.  An approximate (isotropic)
  treatment of cell esds is used for estimating esds involving l.s. planes.

Angles between planes (with approximate esd)

Carboxylate(C3 O2 O4) - Carboxylate(C1 O1 O3) = 30.4(23)
Carboxylate(C1 O1 O3) - Equatorial plane (Cl1 Cl2 O1 O2) = 23.5(17)
Carboxylate(C3 O2 O4) - Equatorial plane (Cl1 Cl2 O1 O2) = 19.8(13)
Equatorial plane(Cl1 Cl2 O1 O2) - Ring planar section(C1 O1 O2 C3)=16.1(5)

  Least-squares planes (x,y,z in crystal coordinates) and deviations from them
  (* indicates atom used to define plane)

-------------------------
   2.4220 (0.2625) x - 6.5731 (0.3108) y + 16.6367 (0.1174) z = 8.6592 (0.0695)

  *    0.0000 (0.0000)  C3
  *    0.0000 (0.0000)  O2
  *    0.0000 (0.0000)  O4

  Rms deviation of fitted atoms =   0.0000
----------------------------
   6.7778 (0.1418) x - 3.0479 (0.1209) y + 11.6750 (0.3138) z = 6.7247 (0.1941)

  *    0.0000 (0.0001)  C1
  *    0.0000 (0.0000)  O1
  *    0.0000 (0.0000)  O3

  Rms deviation of fitted atoms =   0.0000
--------------------------
   3.7470 (0.0174) x - 0.1693 (0.0386) y + 16.5210 (0.0195) z = 10.0328 (0.0157)

  *    0.0019 (0.0027)  Cl1
  *   -0.0020 (0.0028)  Cl2
  *    0.0025 (0.0034)  O1
  *   -0.0024 (0.0034)  O2
      -0.0061 (0.0030)  Re1
       2.3387 (0.0048)  Cl3
      -2.3702 (0.0047)  Cl4
      -0.3109 (0.0135)  C1
      -0.9524 (0.0176)  C2
      -0.3936 (0.0174)  C3
      -0.1429 (0.0131)  O3
      -0.4316 (0.0152)  O4

  Rms deviation of fitted atoms =   0.0022
-------------------------------
   4.2254 (0.0358) x - 5.6028 (0.1713) y + 15.1858 (0.0759) z = 8.4711 (0.0627)

  *    0.0209 (0.0060)  C1
  *   -0.0207 (0.0060)  C3
  *   -0.0195 (0.0056)  O1
  *    0.0194 (0.0056)  O2
      -0.4077 (0.0163)  Re1
      -0.4297 (0.0226)  C2
       0.3756 (0.0185)  O3
       0.1625 (0.0243)  O4
      -0.8286 (0.0300)  Cl1
      -0.8558 (0.0316)  Cl2

  Rms deviation of fitted atoms =   0.0201
---------------------------------------

;


loop_
  _geom_bond_atom_site_label_1
  _geom_bond_atom_site_label_2
  _geom_bond_distance
  _geom_bond_site_symmetry_2
  _geom_bond_publ_flag
Re1 O1 2.004(8) . ?
Re1 O2 2.011(8) . ?
Re1 Cl1 2.337(3) . ?
Re1 Cl2 2.333(3) . ?
Re1 Cl3 2.345(3) . ?
Re1 Cl4 2.366(3) . ?
O1 C1 1.274(14) . ?
O2 C3 1.289(14) . ?
C1 O3 1.213(14) . ?
C1 C2 1.515(17) . ?
C2 C3 1.530(16) . ?
C2 H2A 0.9700 . ?
C2 H2B 0.9700 . ?
C3 O4 1.214(14) . ?
As1 C41 1.905(11) . ?
As1 C11 1.905(11) . ?
As1 C31 1.908(11) . ?
As1 C21 1.918(12) . ?
C11 C16 1.365(15) . ?
C11 C12 1.394(15) . ?
C12 C13 1.351(18) . ?
C12 H12 0.9300 . ?
C13 C14 1.418(19) . ?
C13 H13 0.9300 . ?
C14 C15 1.381(19) . ?
C14 H14 0.9300 . ?
C15 C16 1.364(17) . ?
C15 H15 0.9300 . ?
C16 H16 0.9300 . ?
C21 C26 1.350(16) . ?
C21 C22 1.363(16) . ?
C22 C23 1.356(19) . ?
C22 H22 0.9300 . ?
C23 C24 1.37(2) . ?
C23 H23 0.9300 . ?
C24 C25 1.35(2) . ?
C24 H24 0.9300 . ?
C25 C26 1.359(18) . ?
C25 H25 0.9300 . ?
C26 H26 0.9300 . ?
C31 C32 1.376(16) . ?
C31 C36 1.379(16) . ?
C32 C33 1.365(17) . ?
C32 H32 0.9300 . ?
C33 C34 1.370(17) . ?
C33 H33 0.9300 . ?
C34 C35 1.379(18) . ?
C34 H34 0.9300 . ?
C35 C36 1.393(17) . ?
C35 H35 0.9300 . ?
C36 H36 0.9300 . ?
C41 C46 1.380(15) . ?
C41 C42 1.394(16) . ?
C42 C43 1.367(17) . ?
C42 H42 0.9300 . ?
C43 C44 1.365(19) . ?
C43 H43 0.9300 . ?
C44 C45 1.388(19) . ?
C44 H44 0.9300 . ?
C45 C46 1.390(17) . ?
C45 H45 0.9300 . ?
C46 H46 0.9300 . ?
N1 C53 1.448(15) . ?
N1 C55 1.457(15) . ?
N1 C51 1.468(15) . ?
N1 H1 0.9100 . ?
C51 C52 1.398(17) . ?
C51 H51A 0.9700 . ?
C51 H51B 0.9700 . ?
C52 H52A 0.9600 . ?
C52 H52B 0.9600 . ?
C52 H52C 0.9600 . ?
C53 C54 1.383(17) . ?
C53 H53A 0.9700 . ?
C53 H53B 0.9700 . ?
C54 H54A 0.9600 . ?
C54 H54B 0.9600 . ?
C54 H54C 0.9600 . ?
C55 C56 1.376(17) . ?
C55 H55A 0.9700 . ?
C55 H55B 0.9700 . ?
C56 H56A 0.9600 . ?
C56 H56B 0.9600 . ?
C56 H56C 0.9600 . ?

loop_
  _geom_angle_atom_site_label_1
  _geom_angle_atom_site_label_2
  _geom_angle_atom_site_label_3
  _geom_angle
  _geom_angle_site_symmetry_1
  _geom_angle_site_symmetry_3
  _geom_angle_publ_flag
O1 Re1 O2 87.1(3) . . ?
O1 Re1 Cl2 87.7(2) . . ?
O2 Re1 Cl2 174.8(2) . . ?
O1 Re1 Cl1 178.2(2) . . ?
O2 Re1 Cl1 91.1(2) . . ?
Cl2 Re1 Cl1 94.00(12) . . ?
O1 Re1 Cl3 89.9(2) . . ?
O2 Re1 Cl3 88.6(3) . . ?
Cl2 Re1 Cl3 91.24(14) . . ?
Cl1 Re1 Cl3 89.60(12) . . ?
O1 Re1 Cl4 90.7(2) . . ?
O2 Re1 Cl4 88.0(2) . . ?
Cl2 Re1 Cl4 92.29(13) . . ?
Cl1 Re1 Cl4 89.64(12) . . ?
Cl3 Re1 Cl4 176.43(14) . . ?
C1 O1 Re1 131.5(8) . . ?
C3 O2 Re1 128.8(8) . . ?
O3 C1 O1 121.6(12) . . ?
O3 C1 C2 119.1(12) . . ?
O1 C1 C2 119.3(12) . . ?
C1 C2 C3 116.3(10) . . ?
C1 C2 H2A 108.2 . . ?
C3 C2 H2A 108.2 . . ?
C1 C2 H2B 108.2 . . ?
C3 C2 H2B 108.2 . . ?
H2A C2 H2B 107.4 . . ?
O4 C3 O2 121.4(12) . . ?
O4 C3 C2 117.1(12) . . ?
O2 C3 C2 121.3(11) . . ?
C41 As1 C11 109.6(5) . . ?
C41 As1 C31 110.4(5) . . ?
C11 As1 C31 107.9(5) . . ?
C41 As1 C21 107.8(5) . . ?
C11 As1 C21 108.6(5) . . ?
C31 As1 C21 112.5(5) . . ?
C16 C11 C12 119.3(11) . . ?
C16 C11 As1 121.5(9) . . ?
C12 C11 As1 119.2(10) . . ?
C13 C12 C11 120.7(13) . . ?
C13 C12 H12 119.6 . . ?
C11 C12 H12 119.6 . . ?
C12 C13 C14 119.5(14) . . ?
C12 C13 H13 120.3 . . ?
C14 C13 H13 120.3 . . ?
C15 C14 C13 119.3(15) . . ?
C15 C14 H14 120.4 . . ?
C13 C14 H14 120.4 . . ?
C16 C15 C14 119.8(15) . . ?
C16 C15 H15 120.1 . . ?
C14 C15 H15 120.1 . . ?
C15 C16 C11 121.3(13) . . ?
C15 C16 H16 119.3 . . ?
C11 C16 H16 119.3 . . ?
C26 C21 C22 120.7(12) . . ?
C26 C21 As1 121.4(10) . . ?
C22 C21 As1 117.8(10) . . ?
C23 C22 C21 117.7(13) . . ?
C23 C22 H22 121.1 . . ?
C21 C22 H22 121.1 . . ?
C22 C23 C24 123.0(14) . . ?
C22 C23 H23 118.5 . . ?
C24 C23 H23 118.5 . . ?
C25 C24 C23 117.1(14) . . ?
C25 C24 H24 121.4 . . ?
C23 C24 H24 121.4 . . ?
C24 C25 C26 121.1(15) . . ?
C24 C25 H25 119.4 . . ?
C26 C25 H25 119.4 . . ?
C21 C26 C25 120.2(14) . . ?
C21 C26 H26 119.9 . . ?
C25 C26 H26 119.9 . . ?
C32 C31 C36 119.5(11) . . ?
C32 C31 As1 118.6(9) . . ?
C36 C31 As1 121.9(9) . . ?
C33 C32 C31 119.6(12) . . ?
C33 C32 H32 120.2 . . ?
C31 C32 H32 120.2 . . ?
C32 C33 C34 122.4(13) . . ?
C32 C33 H33 118.8 . . ?
C34 C33 H33 118.8 . . ?
C33 C34 C35 118.0(12) . . ?
C33 C34 H34 121.0 . . ?
C35 C34 H34 121.0 . . ?
C34 C35 C36 120.5(12) . . ?
C34 C35 H35 119.7 . . ?
C36 C35 H35 119.7 . . ?
C31 C36 C35 119.9(12) . . ?
C31 C36 H36 120.1 . . ?
C35 C36 H36 120.1 . . ?
C46 C41 C42 120.5(11) . . ?
C46 C41 As1 119.6(9) . . ?
C42 C41 As1 119.7(9) . . ?
C43 C42 C41 120.1(12) . . ?
C43 C42 H42 120.0 . . ?
C41 C42 H42 120.0 . . ?
C44 C43 C42 118.7(14) . . ?
C44 C43 H43 120.7 . . ?
C42 C43 H43 120.7 . . ?
C43 C44 C45 123.3(14) . . ?
C43 C44 H44 118.4 . . ?
C45 C44 H44 118.4 . . ?
C44 C45 C46 117.4(13) . . ?
C44 C45 H45 121.3 . . ?
C46 C45 H45 121.3 . . ?
C41 C46 C45 120.0(12) . . ?
C41 C46 H46 120.0 . . ?
C45 C46 H46 120.0 . . ?
C53 N1 C55 113.3(11) . . ?
C53 N1 C51 113.7(10) . . ?
C55 N1 C51 110.8(10) . . ?
C53 N1 H1 106.1 . . ?
C55 N1 H1 106.1 . . ?
C51 N1 H1 106.1 . . ?
C52 C51 N1 113.8(14) . . ?
C52 C51 H51A 108.8 . . ?
N1 C51 H51A 108.8 . . ?
C52 C51 H51B 108.8 . . ?
N1 C51 H51B 108.8 . . ?
H51A C51 H51B 107.7 . . ?
C51 C52 H52A 109.5 . . ?
C51 C52 H52B 109.5 . . ?
H52A C52 H52B 109.5 . . ?
C51 C52 H52C 109.5 . . ?
H52A C52 H52C 109.5 . . ?
H52B C52 H52C 109.5 . . ?
C54 C53 N1 115.2(15) . . ?
C54 C53 H53A 108.5 . . ?
N1 C53 H53A 108.5 . . ?
C54 C53 H53B 108.5 . . ?
N1 C53 H53B 108.5 . . ?
H53A C53 H53B 107.5 . . ?
C53 C54 H54A 109.5 . . ?
C53 C54 H54B 109.5 . . ?
H54A C54 H54B 109.5 . . ?
C53 C54 H54C 109.5 . . ?
H54A C54 H54C 109.5 . . ?
H54B C54 H54C 109.5 . . ?
C56 C55 N1 116.0(16) . . ?
C56 C55 H55A 108.3 . . ?
N1 C55 H55A 108.3 . . ?
C56 C55 H55B 108.3 . . ?
N1 C55 H55B 108.3 . . ?
H55A C55 H55B 107.4 . . ?
C55 C56 H56A 109.5 . . ?
C55 C56 H56B 109.5 . . ?
H56A C56 H56B 109.5 . . ?
C55 C56 H56C 109.5 . . ?
H56A C56 H56C 109.5 . . ?
H56B C56 H56C 109.5 . . ?


loop_
  _geom_torsion_atom_site_label_1
  _geom_torsion_atom_site_label_2
  _geom_torsion_atom_site_label_3
  _geom_torsion_atom_site_label_4
  _geom_torsion
  _geom_torsion_site_symmetry_1
  _geom_torsion_site_symmetry_2
  _geom_torsion_site_symmetry_3
  _geom_torsion_site_symmetry_4
  _geom_torsion_publ_flag
O2 Re1 O1 C1 -19.5(10) . . . . ?
Cl2 Re1 O1 C1 160.7(10) . . . . ?
Cl1 Re1 O1 C1 -33(8) . . . . ?
Cl3 Re1 O1 C1 -108.1(9) . . . . ?
Cl4 Re1 O1 C1 68.4(10) . . . . ?
O1 Re1 O2 C3 23.3(12) . . . . ?
Cl2 Re1 O2 C3 25(3) . . . . ?
Cl1 Re1 O2 C3 -157.2(12) . . . . ?
Cl3 Re1 O2 C3 113.3(12) . . . . ?
Cl4 Re1 O2 C3 -67.6(12) . . . . ?
Re1 O1 C1 O3 174.4(8) . . . . ?
Re1 O1 C1 C2 -7.7(16) . . . . ?
O3 C1 C2 C3 -142.0(13) . . . . ?
O1 C1 C2 C3 40.1(19) . . . . ?
Re1 O2 C3 O4 174.0(11) . . . . ?
Re1 O2 C3 C2 0(2) . . . . ?
C1 C2 C3 O4 149.3(15) . . . . ?
C1 C2 C3 O2 -36(2) . . . . ?
C41 As1 C11 C16 -100.6(10) . . . . ?
C31 As1 C11 C16 139.1(9) . . . . ?
C21 As1 C11 C16 16.9(11) . . . . ?
C41 As1 C11 C12 77.4(10) . . . . ?
C31 As1 C11 C12 -42.9(11) . . . . ?
C21 As1 C11 C12 -165.1(9) . . . . ?
C16 C11 C12 C13 2.0(19) . . . . ?
As1 C11 C12 C13 -176.1(11) . . . . ?
C11 C12 C13 C14 -2(2) . . . . ?
C12 C13 C14 C15 1(2) . . . . ?
C13 C14 C15 C16 -1(2) . . . . ?
C14 C15 C16 C11 1(2) . . . . ?
C12 C11 C16 C15 -1.4(19) . . . . ?
As1 C11 C16 C15 176.6(10) . . . . ?
C41 As1 C21 C26 -160.2(10) . . . . ?
C11 As1 C21 C26 81.1(11) . . . . ?
C31 As1 C21 C26 -38.2(12) . . . . ?
C41 As1 C21 C22 24.2(12) . . . . ?
C11 As1 C21 C22 -94.5(11) . . . . ?
C31 As1 C21 C22 146.2(10) . . . . ?
C26 C21 C22 C23 -3(2) . . . . ?
As1 C21 C22 C23 172.4(11) . . . . ?
C21 C22 C23 C24 -1(2) . . . . ?
C22 C23 C24 C25 3(2) . . . . ?
C23 C24 C25 C26 -3(2) . . . . ?
C22 C21 C26 C25 4(2) . . . . ?
As1 C21 C26 C25 -171.5(11) . . . . ?
C24 C25 C26 C21 -1(2) . . . . ?
C41 As1 C31 C32 -174.0(10) . . . . ?
C11 As1 C31 C32 -54.2(11) . . . . ?
C21 As1 C31 C32 65.5(11) . . . . ?
C41 As1 C31 C36 5.5(12) . . . . ?
C11 As1 C31 C36 125.3(10) . . . . ?
C21 As1 C31 C36 -115.0(10) . . . . ?
C36 C31 C32 C33 2(2) . . . . ?
As1 C31 C32 C33 -178.6(11) . . . . ?
C31 C32 C33 C34 -2(2) . . . . ?
C32 C33 C34 C35 -1(2) . . . . ?
C33 C34 C35 C36 3(2) . . . . ?
C32 C31 C36 C35 0.9(18) . . . . ?
As1 C31 C36 C35 -178.6(9) . . . . ?
C34 C35 C36 C31 -3.5(19) . . . . ?
C11 As1 C41 C46 -11.7(11) . . . . ?
C31 As1 C41 C46 107.0(10) . . . . ?
C21 As1 C41 C46 -129.7(10) . . . . ?
C11 As1 C41 C42 173.1(9) . . . . ?
C31 As1 C41 C42 -68.2(11) . . . . ?
C21 As1 C41 C42 55.0(11) . . . . ?
C46 C41 C42 C43 1(2) . . . . ?
As1 C41 C42 C43 175.7(10) . . . . ?
C41 C42 C43 C44 1(2) . . . . ?
C42 C43 C44 C45 0(2) . . . . ?
C43 C44 C45 C46 -3(2) . . . . ?
C42 C41 C46 C45 -3.1(19) . . . . ?
As1 C41 C46 C45 -178.4(10) . . . . ?
C44 C45 C46 C41 4(2) . . . . ?
C53 N1 C51 C52 -73(2) . . . . ?
C55 N1 C51 C52 56(2) . . . . ?
C55 N1 C53 C54 173.4(19) . . . . ?
C51 N1 C53 C54 -59(3) . . . . ?
C53 N1 C55 C56 -76(2) . . . . ?
C51 N1 C55 C56 155(2) . . . . ?

loop_
  _geom_hbond_atom_site_label_D
  _geom_hbond_atom_site_label_H
  _geom_hbond_atom_site_label_A
  _geom_hbond_distance_DH
  _geom_hbond_distance_HA
  _geom_hbond_distance_DA
  _geom_hbond_angle_DHA
  _geom_hbond_site_symmetry_A
N1 H1 O2  0.91 2.59 3.198(16) 125.0 .
N1 H1 O4  0.91 1.86 2.764(18) 172.4 .

_diffrn_measured_fraction_theta_max    0.996
_diffrn_reflns_theta_full              25.52
_diffrn_measured_fraction_theta_full   0.996
_refine_diff_density_max    1.268
_refine_diff_density_min   -2.326
_refine_diff_density_rms    0.154

# END OF COMPOUND 1b.


data_comp2

_audit_creation_method            SHELXL-97
_chemical_name_systematic
;
  ?
;
_chemical_name_common             ?
_chemical_melting_point           ?
_chemical_formula_moiety         
  'C27 H18 Cl4 Cu N4 O4 Re, C2 H3 N'
_chemical_formula_sum
  'C29 H21 Cl4 Cu N5 O4 Re'
_chemical_formula_weight          895.05

loop_
  _atom_type_symbol
  _atom_type_description
  _atom_type_scat_dispersion_real
  _atom_type_scat_dispersion_imag
  _atom_type_scat_source
  'C'  'C'   0.0033   0.0016
  'International Tables Vol C Tables 4.2.6.8 and 6.1.1.4'
  'H'  'H'   0.0000   0.0000
  'International Tables Vol C Tables 4.2.6.8 and 6.1.1.4'
  'N'  'N'   0.0061   0.0033
  'International Tables Vol C Tables 4.2.6.8 and 6.1.1.4'
  'O'  'O'   0.0106   0.0060
  'International Tables Vol C Tables 4.2.6.8 and 6.1.1.4'
  'Cl'  'Cl'   0.1484   0.1585
  'International Tables Vol C Tables 4.2.6.8 and 6.1.1.4'
  'Cu'  'Cu'   0.3201   1.2651
  'International Tables Vol C Tables 4.2.6.8 and 6.1.1.4'
  'Re'  'Re'  -1.0185   7.2310
  'International Tables Vol C Tables 4.2.6.8 and 6.1.1.4'

_symmetry_cell_setting            triclinic
_symmetry_space_group_name_H-M    P-1

loop_
  _symmetry_equiv_pos_as_xyz
  'x, y, z'
  '-x, -y, -z'

_cell_length_a                    10.1199(13)
_cell_length_b                    17.8635(14)
_cell_length_c                    9.5576(9)
_cell_angle_alpha                 98.560(7)
_cell_angle_beta                  115.970(8)
_cell_angle_gamma                 96.180(9)
_cell_volume                      1506.7(3)
_cell_formula_units_Z             2
_cell_measurement_temperature     273(2)
_cell_measurement_reflns_used     25
_cell_measurement_theta_min       14.66
_cell_measurement_theta_max       16.08

_exptl_crystal_description        plate
_exptl_crystal_colour             green
_exptl_crystal_size_max           0.15
_exptl_crystal_size_mid           0.10
_exptl_crystal_size_min           0.02
_exptl_crystal_density_meas       ?
_exptl_crystal_density_diffrn     1.973
_exptl_crystal_density_method     'not measured'
_exptl_crystal_F_000              868
_exptl_absorpt_coefficient_mu     5.119
_exptl_absorpt_correction_type    'psi-scan'
_exptl_absorpt_correction_T_min   0.5139
_exptl_absorpt_correction_T_max   0.9045
_exptl_absorpt_process_details    'MSC/AFC Diffractometer Software, 1993'

_exptl_special_details
;
  ?
;

_diffrn_ambient_temperature       273(2)
_diffrn_radiation_wavelength      0.71069
_diffrn_radiation_type            MoK\a
_diffrn_radiation_source          'fine-focus sealed tube'
_diffrn_radiation_monochromator   graphite
_diffrn_measurement_device_type   'Rigaku AFC-7S'
_diffrn_measurement_method        \q/2\q
_diffrn_detector_area_resol_mean  ?
_diffrn_standards_number          3
_diffrn_standards_interval_count  200
_diffrn_standards_interval_time   ?
_diffrn_standards_decay_%         0
_diffrn_reflns_number             8079
_diffrn_reflns_av_R_equivalents   0.0418
_diffrn_reflns_av_sigmaI/netI     0.0799
_diffrn_reflns_limit_h_min        -1
_diffrn_reflns_limit_h_max        13
_diffrn_reflns_limit_k_min        -23
_diffrn_reflns_limit_k_max        23
_diffrn_reflns_limit_l_min        -12
_diffrn_reflns_limit_l_max        11
_diffrn_reflns_theta_min          2.28
_diffrn_reflns_theta_max          27.45
_reflns_number_total              6900
_reflns_number_gt                 5114
_reflns_threshold_expression      >2sigma(I)

_computing_data_collection        'MSC/AFC Diffractometer Software, 1993'
_computing_cell_refinement        'MSC/AFC Diffractometer Software, 1993'
_computing_data_reduction         'MSC/AFC Diffractometer Software, 1993'
_computing_structure_solution     'SHELXS-97 (Sheldrick, 1990)'
_computing_structure_refinement   'SHELXL-97 (Sheldrick, 1997)'
_computing_molecular_graphics     'ZORTEP (Zsolnai & Pritzkow, 1995)'
_computing_publication_material  
'PLATON (Spek, 1990) and CSD (Allen & Kennard,1993)'

_refine_special_details
;
  Refinement of F^2^ against ALL reflections.  The weighted R-factor wR and
  goodness of fit S are based on F^2^, conventional R-factors R are based
  on F, with F set to zero for negative F^2^. The threshold expression of
  F^2^ > 2sigma(F^2^) is used only for calculating R-factors(gt) etc. and is
  not relevant to the choice of reflections for refinement.  R-factors based
  on F^2^ are statistically about twice as large as those based on F, and R-
  factors based on ALL data will be even larger.
;

_refine_ls_structure_factor_coef  Fsqd 
_refine_ls_matrix_type            full
_refine_ls_weighting_scheme       calc 
_refine_ls_weighting_details
  'calc w=1/[\s^2^(Fo^2^)+(0.0548P)^2^+0.1912P] where P=(Fo^2^+2Fc^2^)/3'
_atom_sites_solution_primary      direct
_atom_sites_solution_secondary    difmap
_atom_sites_solution_hydrogens    geom
_refine_ls_hydrogen_treatment     mixed
_refine_ls_extinction_method      none
_refine_ls_extinction_coef        ?
_refine_ls_number_reflns          6900
_refine_ls_number_parameters      398
_refine_ls_number_restraints      0
_refine_ls_R_factor_all           0.0704
_refine_ls_R_factor_gt            0.0415
_refine_ls_wR_factor_ref          0.1197
_refine_ls_wR_factor_gt           0.1075
_refine_ls_goodness_of_fit_ref    1.039
_refine_ls_restrained_S_all       1.039
_refine_ls_shift/su_max           0.002
_refine_ls_shift/su_mean          0.000

loop_
  _atom_site_label
  _atom_site_type_symbol
  _atom_site_fract_x
  _atom_site_fract_y
  _atom_site_fract_z
  _atom_site_U_iso_or_equiv
  _atom_site_adp_type
  _atom_site_occupancy
  _atom_site_symmetry_multiplicity
  _atom_site_calc_flag
  _atom_site_refinement_flags
  _atom_site_disorder_assembly
  _atom_site_disorder_group
Re1 Re -0.05604(3) 0.715728(14) 0.87060(3) 0.03066(9) Uani 1 1 d . . .
Cl1 Cl -0.31703(19) 0.68463(11) 0.7683(2) 0.0470(4) Uani 1 1 d . . .
Cl2 Cl -0.0711(2) 0.71149(11) 0.6169(2) 0.0498(4) Uani 1 1 d . . .
Cl3 Cl -0.0296(2) 0.58626(10) 0.8554(2) 0.0470(4) Uani 1 1 d . . .
Cl4 Cl -0.0634(2) 0.84871(10) 0.9045(2) 0.0472(4) Uani 1 1 d . . .
O1 O 0.1720(5) 0.7451(3) 0.9671(5) 0.0390(10) Uani 1 1 d . . .
O2 O -0.0292(5) 0.7177(3) 1.0913(5) 0.0361(10) Uani 1 1 d . . .
C1 C 0.2625(7) 0.7855(4) 1.1085(8) 0.0363(13) Uani 1 1 d . . .
C2 C 0.2063(8) 0.8083(4) 1.2296(8) 0.0447(16) Uani 1 1 d . . .
H2A H 0.2911 0.8221 1.3354 0.054 Uiso 1 1 calc R . .
H2B H 0.1626 0.8537 1.2092 0.054 Uiso 1 1 calc R . .
C3 C 0.0910(8) 0.7457(4) 1.2275(8) 0.0400(15) Uani 1 1 d . . .
O3 O 0.3962(5) 0.8051(3) 1.1478(6) 0.0430(11) Uani 1 1 d . . .
O4 O 0.1081(7) 0.7256(4) 1.3497(6) 0.0583(15) Uani 1 1 d . . .
Cu1 Cu 0.45684(9) 0.73312(4) 0.97555(9) 0.03621(18) Uani 1 1 d . . .
N11 N 0.3433(6) 0.6449(3) 0.7814(6) 0.0334(11) Uani 1 1 d . . .
N12 N 0.4489(6) 0.6498(3) 1.0916(6) 0.0362(12) Uani 1 1 d . . .
C11 C 0.2964(8) 0.6425(4) 0.6269(8) 0.0415(15) Uani 1 1 d . . .
H11 H 0.3168 0.6876 0.5960 0.050 Uiso 1 1 calc R . .
C12 C 0.2178(9) 0.5753(5) 0.5090(8) 0.0478(17) Uani 1 1 d . . .
H12 H 0.1890 0.5759 0.4025 0.057 Uiso 1 1 calc R . .
C13 C 0.1831(8) 0.5085(4) 0.5505(9) 0.0451(16) Uani 1 1 d . . .
H13 H 0.1290 0.4638 0.4724 0.054 Uiso 1 1 calc R . .
C14 C 0.2302(8) 0.5080(4) 0.7131(8) 0.0373(14) Uani 1 1 d . . .
C15 C 0.1985(9) 0.4427(4) 0.7696(9) 0.0473(17) Uani 1 1 d . . .
H15 H 0.1415 0.3971 0.6960 0.057 Uiso 1 1 calc R . .
C16 C 0.2480(9) 0.4444(4) 0.9261(9) 0.0475(17) Uani 1 1 d . . .
H16 H 0.2256 0.4003 0.9589 0.057 Uiso 1 1 calc R . .
C17 C 0.3366(8) 0.5151(4) 1.0436(8) 0.0373(14) Uani 1 1 d . . .
C18 C 0.3914(9) 0.5218(4) 1.2068(9) 0.0473(17) Uani 1 1 d . . .
H18 H 0.3727 0.4796 1.2464 0.057 Uiso 1 1 calc R . .
C19 C 0.4739(9) 0.5915(4) 1.3101(9) 0.0484(18) Uani 1 1 d . . .
H19 H 0.5119 0.5969 1.4198 0.058 Uiso 1 1 calc R . .
C110 C 0.4989(8) 0.6537(4) 1.2463(8) 0.0413(15) Uani 1 1 d . . .
H110 H 0.5537 0.7006 1.3164 0.050 Uiso 1 1 calc R . .
C111 C 0.3680(7) 0.5810(3) 0.9917(7) 0.0295(12) Uani 1 1 d . . .
C112 C 0.3121(7) 0.5780(4) 0.8233(7) 0.0327(12) Uani 1 1 d . . .
N21 N 0.6695(6) 0.7978(3) 1.1255(6) 0.0334(11) Uani 1 1 d . . .
N22 N 0.4421(6) 0.8214(3) 0.8663(7) 0.0381(12) Uani 1 1 d . . .
C21 C 0.7786(8) 0.7865(4) 1.2578(8) 0.0416(15) Uani 1 1 d . . .
H21 H 0.7696 0.7387 1.2838 0.050 Uiso 1 1 calc R . .
C22 C 0.9060(8) 0.8425(4) 1.3602(9) 0.0456(17) Uani 1 1 d . . .
H22 H 0.9766 0.8334 1.4554 0.055 Uiso 1 1 calc R . .
C23 C 0.9249(8) 0.9111(5) 1.3174(9) 0.0471(17) Uani 1 1 d . . .
H23 H 1.0109 0.9485 1.3818 0.057 Uiso 1 1 calc R . .
C24 C 0.8134(8) 0.9251(4) 1.1751(8) 0.0382(14) Uani 1 1 d . . .
C25 C 0.8262(9) 0.9936(4) 1.1178(10) 0.0525(19) Uani 1 1 d . . .
H25 H 0.9128 1.0313 1.1743 0.063 Uiso 1 1 calc R . .
C26 C 0.7145(10) 1.0043(4) 0.9833(10) 0.0519(19) Uani 1 1 d . . .
H26 H 0.7246 1.0497 0.9492 0.062 Uiso 1 1 calc R . .
C27 C 0.5797(9) 0.9464(4) 0.8914(8) 0.0412(15) Uani 1 1 d . . .
C28 C 0.4563(9) 0.9550(4) 0.7545(10) 0.0500(18) Uani 1 1 d . . .
H28 H 0.4600 0.9995 0.7156 0.060 Uiso 1 1 calc R . .
C29 C 0.3308(9) 0.8984(5) 0.6781(10) 0.0503(18) Uani 1 1 d . . .
H29 H 0.2494 0.9039 0.5866 0.060 Uiso 1 1 calc R . .
C210 C 0.3255(8) 0.8320(4) 0.7385(9) 0.0439(16) Uani 1 1 d . . .
H210 H 0.2384 0.7943 0.6882 0.053 Uiso 1 1 calc R . .
C211 C 0.5658(8) 0.8779(4) 0.9431(8) 0.0359(13) Uani 1 1 d . . .
C212 C 0.6877(7) 0.8668(4) 1.0862(8) 0.0336(13) Uani 1 1 d . . .
N31 N 0.7350(12) 0.9927(6) 0.6060(13) 0.097(3) Uani 1 1 d . . .
C31 C 0.6928(10) 0.9290(6) 0.5822(10) 0.059(2) Uani 1 1 d . . .
C32 C 0.6356(11) 0.8471(5) 0.5477(10) 0.064(2) Uani 1 1 d . . .
H32A H 0.5612 0.8305 0.4380 0.095 Uiso 1 1 calc R . .
H32B H 0.5914 0.8369 0.6152 0.095 Uiso 1 1 calc R . .
H32C H 0.7162 0.8197 0.5668 0.095 Uiso 1 1 calc R . .

loop_
  _atom_site_aniso_label
  _atom_site_aniso_U_11
  _atom_site_aniso_U_22
  _atom_site_aniso_U_33
  _atom_site_aniso_U_23
  _atom_site_aniso_U_13
  _atom_site_aniso_U_12
Re1 0.03046(13) 0.03136(14) 0.02683(13) 0.00615(9) 0.01165(10) 0.00019(9)
Cl1 0.0314(8) 0.0477(10) 0.0513(10) 0.0124(8) 0.0112(7) -0.0010(7)
Cl2 0.0602(11) 0.0555(11) 0.0304(8) 0.0086(7) 0.0205(8) 0.0013(9)
Cl3 0.0545(11) 0.0366(9) 0.0474(9) 0.0075(7) 0.0215(9) 0.0106(8)
Cl4 0.0506(10) 0.0336(8) 0.0513(10) 0.0087(7) 0.0195(8) 0.0023(7)
O1 0.036(2) 0.048(3) 0.032(2) 0.0048(19) 0.017(2) 0.003(2)
O2 0.035(2) 0.043(3) 0.026(2) 0.0070(18) 0.0114(19) 0.0023(19)
C1 0.034(3) 0.037(3) 0.040(3) 0.012(3) 0.016(3) 0.009(3)
C2 0.039(4) 0.055(4) 0.033(3) -0.001(3) 0.014(3) 0.002(3)
C3 0.037(3) 0.045(4) 0.039(3) 0.009(3) 0.017(3) 0.013(3)
O3 0.032(2) 0.052(3) 0.039(2) 0.006(2) 0.014(2) -0.002(2)
O4 0.073(4) 0.077(4) 0.031(3) 0.028(3) 0.022(3) 0.023(3)
Cu1 0.0375(4) 0.0286(4) 0.0336(4) 0.0078(3) 0.0105(3) -0.0034(3)
N11 0.031(3) 0.033(3) 0.031(3) 0.007(2) 0.012(2) -0.002(2)
N12 0.035(3) 0.032(3) 0.032(3) 0.007(2) 0.010(2) -0.002(2)
C11 0.036(3) 0.048(4) 0.045(4) 0.018(3) 0.020(3) 0.007(3)
C12 0.052(4) 0.057(5) 0.030(3) 0.005(3) 0.016(3) 0.006(4)
C13 0.045(4) 0.040(4) 0.040(4) -0.005(3) 0.017(3) 0.000(3)
C14 0.041(4) 0.029(3) 0.038(3) 0.001(3) 0.017(3) 0.001(3)
C15 0.052(4) 0.026(3) 0.050(4) -0.001(3) 0.018(4) -0.006(3)
C16 0.054(4) 0.028(3) 0.057(4) 0.008(3) 0.025(4) -0.003(3)
C17 0.040(3) 0.028(3) 0.044(4) 0.010(3) 0.020(3) 0.002(3)
C18 0.063(5) 0.038(4) 0.044(4) 0.017(3) 0.026(4) 0.002(3)
C19 0.060(5) 0.052(4) 0.038(4) 0.014(3) 0.026(4) 0.012(4)
C110 0.047(4) 0.034(3) 0.034(3) 0.006(3) 0.012(3) 0.002(3)
C111 0.029(3) 0.025(3) 0.031(3) 0.007(2) 0.012(2) 0.000(2)
C112 0.032(3) 0.034(3) 0.031(3) 0.007(2) 0.015(3) 0.003(2)
N21 0.030(3) 0.032(3) 0.034(3) 0.006(2) 0.012(2) 0.000(2)
N22 0.038(3) 0.034(3) 0.039(3) 0.006(2) 0.017(3) 0.003(2)
C21 0.038(4) 0.039(4) 0.043(4) 0.013(3) 0.014(3) 0.003(3)
C22 0.038(4) 0.050(4) 0.041(4) 0.002(3) 0.016(3) 0.003(3)
C23 0.032(3) 0.052(4) 0.043(4) -0.001(3) 0.010(3) 0.000(3)
C24 0.037(3) 0.039(4) 0.037(3) 0.001(3) 0.020(3) -0.002(3)
C25 0.054(5) 0.036(4) 0.063(5) 0.004(3) 0.029(4) -0.011(3)
C26 0.060(5) 0.041(4) 0.054(4) 0.011(3) 0.029(4) -0.009(3)
C27 0.053(4) 0.030(3) 0.045(4) 0.012(3) 0.025(3) 0.007(3)
C28 0.060(5) 0.042(4) 0.062(5) 0.026(4) 0.034(4) 0.016(3)
C29 0.044(4) 0.051(4) 0.052(4) 0.021(3) 0.015(4) 0.012(3)
C210 0.035(3) 0.049(4) 0.042(4) 0.010(3) 0.013(3) 0.006(3)
C211 0.042(4) 0.030(3) 0.039(3) 0.008(3) 0.022(3) 0.005(3)
C212 0.032(3) 0.031(3) 0.035(3) 0.006(2) 0.016(3) 0.001(2)
N31 0.096(8) 0.084(7) 0.107(8) 0.041(6) 0.043(7) -0.004(6)
C31 0.047(5) 0.071(6) 0.050(5) 0.022(4) 0.015(4) 0.005(4)
C32 0.061(5) 0.061(5) 0.044(4) 0.004(4) 0.005(4) 0.013(4)

_geom_special_details
;
  All esds (except the esd in the dihedral angle between two l.s. planes)
  are estimated using the full covariance matrix.  The cell esds are taken
  into account individually in the estimation of esds in distances, angles
  and torsion angles; correlations between esds in cell parameters are only
  used when they are defined by crystal symmetry.  An approximate (isotropic)
  treatment of cell esds is used for estimating esds involving l.s. planes.

Angles between planes (with approximate esd)

Carboxylate(C3 O2 O4) - Carboxylate(C1 O1 O3) = 29.0(9)
Carboxylate(C1 O1 O3) - Equatorial plane (Cl1 Cl2 O1 O2) = 25.31(32)
Carboxylate(C3 O2 O4) - Equatorial plane (Cl1 Cl2 O1 O2) = 31.8(8)
Equatorial plane(Cl1 Cl2 O1 O2) - Ring planar section(C1 O1 O2 C3)=17.16(16)

Carboxilate(C1 O1 O3) - Equatorial Plane (O3 N11 N21) = 33.71(32)
Equatorial Plane (N3 N11 N21) - Apical Atoms-M plane(N22 N12 CU1)=82.03(26)
Angle between (N11 N12 CU1) and (N21 N22 CU1) = 40.25(23)

Angle between both PHEN molecules = 36.62(10)

  Least-squares planes (x,y,z in crystal coordinates) and deviations from them
  (* indicates atom used to define plane)

  - 4.7790 (0.0427) x + 16.0382 (0.0525) y - 1.5257 (0.0312) z = 9.6527 (0.0682)

  *    0.0000 (0.0000)  O1
  *    0.0000 (0.0000)  C1
  *    0.0000 (0.0000)  C3

  Rms deviation of fitted atoms =   0.0000

----------------------------------------
  -6.8850(0.0939) x + 13.8067 (0.1435) y + 3.2368 (0.0645) z = 13.6429 (0.0455)

  *    0.0000 (0.0000)  O2
  *    0.0000 (0.0000)  C3
  *    0.0000 (0.0000)  O4

  Rms deviation of fitted atoms =   0.0000

------------------------------------------
  -2.1522(0.0113) x + 17.6602 (0.0041) y - 0.0525 (0.0110) z = 12.7092 (0.0073)

  *    0.0235 (0.0017)  Cl1
  *   -0.0236 (0.0017)  Cl2
  *    0.0286 (0.0021)  O1
  *   -0.0286 (0.0021)  O2
       0.0057 (0.0019)  Re1
       0.5402 (0.0083)  C1
       1.0567 (0.0096)  C2
       0.2005 (0.0087)  C3
       0.5967 (0.0084)  O3
      -0.1985 (0.0086)  O4
      -2.3368 (0.0026)  Cl3
       2.3683 (0.0026)  Cl4
      -0.7965 (0.0066)  Cu1

  Rms deviation of fitted atoms =   0.0262

------------------------------------------
  -3.8449(0.0226) x + 16.9833 (0.0204) y - 1.2637 (0.0328) z = 10.8470 (0.0475)

  *   -0.0761 (0.0029)  O1
  *    0.0754 (0.0029)  O2
  *    0.0837 (0.0032)  C1
  *   -0.0830 (0.0032)  C3
       0.4237 (0.0091)  Re1
       0.5333 (0.0111)  C2
      -0.1471 (0.0106)  O3
      -0.6453 (0.0108)  O4
       1.0283 (0.0165)  Cl1
       0.7301 (0.0171)  Cl2

  Rms deviation of fitted atoms =   0.0796

---------------------------------------------
  - 0.1248 (0.0260) x + 14.5182 (0.0183) y - 6.3293 (0.0147) z = 4.3750 (0.0237)

  *    0.0000 (0.0001)  O3
  *    0.0000 (0.0000)  N11
  *    0.0000 (0.0000)  N21
       0.0371 (0.0032)  Cu1
      -1.9060 (0.0061)  N12
       2.0116 (0.0064)  N22

  Rms deviation of fitted atoms =   0.0000

------------------------------------------
   1.5465 (0.0961) x + 7.7648 (0.0611) y + 5.8655 (0.0431) z = 12.1356 (0.0361)

  *    0.0073 (0.0009)  N12
  *   -0.0145 (0.0016)  Cu1
  *    0.0072 (0.0008)  N22
       1.4612 (0.0188)  O3
      -2.0139 (0.0052)  N11
       0.0072 (0.0008)  N22

  Rms deviation of fitted atoms =   0.0103

--------------------------------------
  - 9.8918 (0.0062) x + 5.5183 (0.0467) y + 3.2785 (0.0272) z = 2.7249 (0.0359)

  *    0.0000 (0.0001)  N11
  *    0.0000 (0.0001)  Cu1
  *    0.0000 (0.0000)  N12

  Rms deviation of fitted atoms =   0.0000

---------------------------------------
  - 7.4523 (0.0183) x + 7.7214 (0.0446) y + 7.2412 (0.0183) z = 9.3204 (0.0271)

  *    0.0000 (0.0000)  N21
  *    0.0000 (0.0000)  Cu1
  *    0.0000 (0.0000)  N22

  Rms deviation of fitted atoms =   0.0000

--------------------------------------------
  - 9.6845 (0.0047) x + 6.8908 (0.0261) y + 2.9860 (0.0089) z = 3.4073 (0.0159)

  *    0.0455 (0.0052)  N11
  *   -0.0167 (0.0055)  N12
  *    0.0219 (0.0059)  C11
  *   -0.0322 (0.0067)  C12
  *   -0.0329 (0.0067)  C13
  *   -0.0071 (0.0066)  C14
  *    0.0187 (0.0068)  C15
  *    0.0182 (0.0068)  C16
  *   -0.0010 (0.0065)  C17
  *    0.0013 (0.0073)  C18
  *   -0.0085 (0.0068)  C19
  *   -0.0122 (0.0064)  C110
  *   -0.0063 (0.0060)  C111
  *    0.0112 (0.0061)  C112
       0.1333 (0.0051)  Cu1
       1.7307 (0.0082)  O3

  Rms deviation of fitted atoms =   0.0208

------------------------------------------
  - 7.9045 (0.0081) x + 6.9061 (0.0239) y + 7.2669 (0.0066) z = 8.4726 (0.0211)

  *   -0.0766 (0.0052)  N21
  *    0.0004 (0.0054)  N22
  *   -0.0548 (0.0062)  C21
  *    0.0684 (0.0062)  C22
  *    0.0823 (0.0066)  C23
  *    0.0258 (0.0062)  C24
  *   -0.0182 (0.0070)  C25
  *   -0.0395 (0.0072)  C26
  *   -0.0414 (0.0068)  C27
  *   -0.0013 (0.0069)  C28
  *    0.0447 (0.0069)  C29
  *    0.0667 (0.0062)  C210
  *   -0.0282 (0.0063)  C211
  *   -0.0284 (0.0062)  C212
       0.0685 (0.0049)  Cu1
       2.2965 (0.0066)  O3

  Rms deviation of fitted atoms =   0.0483

--------------------------------------------
;

loop_
  _geom_bond_atom_site_label_1
  _geom_bond_atom_site_label_2
  _geom_bond_distance
  _geom_bond_site_symmetry_2
  _geom_bond_publ_flag
Re1 O2 2.000(4) . ?
Re1 O1 2.045(5) . ?
Re1 Cl1 2.3455(18) . ?
Re1 Cl3 2.3471(17) . ?
Re1 Cl2 2.3516(16) . ?
Re1 Cl4 2.3630(17) . ?
O1 C1 1.292(8) . ?
O2 C3 1.309(8) . ?
C1 O3 1.228(8) . ?
C1 C2 1.522(9) . ?
C2 C3 1.517(10) . ?
C2 H2A 0.9700 . ?
C2 H2B 0.9700 . ?
C3 O4 1.219(8) . ?
O3 Cu1 2.273(5) . ?
Cu1 N12 1.999(5) . ?
Cu1 N22 2.000(6) . ?
Cu1 N11 2.029(5) . ?
Cu1 N21 2.072(5) . ?
N11 C11 1.330(8) . ?
N11 C112 1.364(8) . ?
N12 C110 1.324(8) . ?
N12 C111 1.357(8) . ?
C11 C12 1.397(10) . ?
C11 H11 0.9300 . ?
C12 C13 1.371(10) . ?
C12 H12 0.9300 . ?
C13 C14 1.413(10) . ?
C13 H13 0.9300 . ?
C14 C112 1.407(9) . ?
C14 C15 1.420(9) . ?
C15 C16 1.348(11) . ?
C15 H15 0.9300 . ?
C16 C17 1.454(9) . ?
C16 H16 0.9300 . ?
C17 C18 1.388(10) . ?
C17 C111 1.401(8) . ?
C18 C19 1.383(11) . ?
C18 H18 0.9300 . ?
C19 C110 1.396(9) . ?
C19 H19 0.9300 . ?
C110 H110 0.9300 . ?
C111 C112 1.444(8) . ?
N21 C21 1.326(8) . ?
N21 C212 1.358(8) . ?
N22 C210 1.332(9) . ?
N22 C211 1.352(8) . ?
C21 C22 1.395(10) . ?
C21 H21 0.9300 . ?
C22 C23 1.369(11) . ?
C22 H22 0.9300 . ?
C23 C24 1.415(10) . ?
C23 H23 0.9300 . ?
C24 C212 1.389(9) . ?
C24 C25 1.428(10) . ?
C25 C26 1.347(12) . ?
C25 H25 0.9300 . ?
C26 C27 1.442(10) . ?
C26 H26 0.9300 . ?
C27 C211 1.401(9) . ?
C27 C28 1.402(10) . ?
C28 C29 1.364(11) . ?
C28 H28 0.9300 . ?
C29 C210 1.401(10) . ?
C29 H29 0.9300 . ?
C210 H210 0.9300 . ?
C211 C212 1.445(9) . ?
N31 C31 1.124(12) . ?
C31 C32 1.445(12) . ?
C32 H32A 0.9600 . ?
C32 H32B 0.9600 . ?
C32 H32C 0.9600 . ?

loop_
  _geom_angle_atom_site_label_1
  _geom_angle_atom_site_label_2
  _geom_angle_atom_site_label_3
  _geom_angle
  _geom_angle_site_symmetry_1
  _geom_angle_site_symmetry_3
  _geom_angle_publ_flag
O2 Re1 O1 87.83(18) . . ?
O2 Re1 Cl1 90.45(14) . . ?
O1 Re1 Cl1 177.95(13) . . ?
O2 Re1 Cl3 86.97(14) . . ?
O1 Re1 Cl3 87.65(15) . . ?
Cl1 Re1 Cl3 93.36(7) . . ?
O2 Re1 Cl2 176.09(14) . . ?
O1 Re1 Cl2 88.66(13) . . ?
Cl1 Re1 Cl2 93.09(7) . . ?
Cl3 Re1 Cl2 91.16(7) . . ?
O2 Re1 Cl4 90.47(14) . . ?
O1 Re1 Cl4 88.36(15) . . ?
Cl1 Re1 Cl4 90.55(7) . . ?
Cl3 Re1 Cl4 175.34(7) . . ?
Cl2 Re1 Cl4 91.16(7) . . ?
C1 O1 Re1 126.4(4) . . ?
C3 O2 Re1 128.6(4) . . ?
O3 C1 O1 120.2(6) . . ?
O3 C1 C2 119.0(6) . . ?
O1 C1 C2 120.8(6) . . ?
C3 C2 C1 114.3(6) . . ?
C3 C2 H2A 108.7 . . ?
C1 C2 H2A 108.7 . . ?
C3 C2 H2B 108.7 . . ?
C1 C2 H2B 108.7 . . ?
H2A C2 H2B 107.6 . . ?
O4 C3 O2 122.2(7) . . ?
O4 C3 C2 120.7(7) . . ?
O2 C3 C2 117.0(6) . . ?
C1 O3 Cu1 110.1(4) . . ?
N12 Cu1 N22 171.9(2) . . ?
N12 Cu1 N11 82.6(2) . . ?
N22 Cu1 N11 99.4(2) . . ?
N12 Cu1 N21 101.4(2) . . ?
N22 Cu1 N21 82.0(2) . . ?
N11 Cu1 N21 142.1(2) . . ?
N12 Cu1 O3 85.2(2) . . ?
N22 Cu1 O3 87.9(2) . . ?
N11 Cu1 O3 134.8(2) . . ?
N21 Cu1 O3 82.94(19) . . ?
C11 N11 C112 117.3(6) . . ?
C11 N11 Cu1 131.3(5) . . ?
C112 N11 Cu1 111.4(4) . . ?
C110 N12 C111 117.0(5) . . ?
C110 N12 Cu1 129.9(5) . . ?
C111 N12 Cu1 112.8(4) . . ?
N11 C11 C12 122.8(6) . . ?
N11 C11 H11 118.6 . . ?
C12 C11 H11 118.6 . . ?
C13 C12 C11 119.9(7) . . ?
C13 C12 H12 120.1 . . ?
C11 C12 H12 120.1 . . ?
C12 C13 C14 119.4(6) . . ?
C12 C13 H13 120.3 . . ?
C14 C13 H13 120.3 . . ?
C112 C14 C13 116.5(6) . . ?
C112 C14 C15 119.2(6) . . ?
C13 C14 C15 124.3(6) . . ?
C16 C15 C14 122.4(6) . . ?
C16 C15 H15 118.8 . . ?
C14 C15 H15 118.8 . . ?
C15 C16 C17 119.8(6) . . ?
C15 C16 H16 120.1 . . ?
C17 C16 H16 120.1 . . ?
C18 C17 C111 117.3(6) . . ?
C18 C17 C16 123.5(6) . . ?
C111 C17 C16 119.2(6) . . ?
C19 C18 C17 119.6(6) . . ?
C19 C18 H18 120.2 . . ?
C17 C18 H18 120.2 . . ?
C18 C19 C110 118.6(7) . . ?
C18 C19 H19 120.7 . . ?
C110 C19 H19 120.7 . . ?
N12 C110 C19 123.7(6) . . ?
N12 C110 H110 118.2 . . ?
C19 C110 H110 118.2 . . ?
N12 C111 C17 123.7(6) . . ?
N12 C111 C112 116.4(5) . . ?
C17 C111 C112 119.9(5) . . ?
N11 C112 C14 124.0(6) . . ?
N11 C112 C111 116.7(5) . . ?
C14 C112 C111 119.4(5) . . ?
C21 N21 C212 117.3(6) . . ?
C21 N21 Cu1 131.1(5) . . ?
C212 N21 Cu1 111.1(4) . . ?
C210 N22 C211 118.8(6) . . ?
C210 N22 Cu1 128.2(5) . . ?
C211 N22 Cu1 112.8(4) . . ?
N21 C21 C22 123.5(7) . . ?
N21 C21 H21 118.2 . . ?
C22 C21 H21 118.2 . . ?
C23 C22 C21 118.6(7) . . ?
C23 C22 H22 120.7 . . ?
C21 C22 H22 120.7 . . ?
C22 C23 C24 119.9(7) . . ?
C22 C23 H23 120.1 . . ?
C24 C23 H23 120.1 . . ?
C212 C24 C23 116.7(6) . . ?
C212 C24 C25 119.5(7) . . ?
C23 C24 C25 123.8(7) . . ?
C26 C25 C24 121.0(7) . . ?
C26 C25 H25 119.5 . . ?
C24 C25 H25 119.5 . . ?
C25 C26 C27 121.0(7) . . ?
C25 C26 H26 119.5 . . ?
C27 C26 H26 119.5 . . ?
C211 C27 C28 116.6(7) . . ?
C211 C27 C26 119.2(7) . . ?
C28 C27 C26 124.1(6) . . ?
C29 C28 C27 120.2(7) . . ?
C29 C28 H28 119.9 . . ?
C27 C28 H28 119.9 . . ?
C28 C29 C210 119.5(7) . . ?
C28 C29 H29 120.2 . . ?
C210 C29 H29 120.2 . . ?
N22 C210 C29 121.6(7) . . ?
N22 C210 H210 119.2 . . ?
C29 C210 H210 119.2 . . ?
N22 C211 C27 123.1(6) . . ?
N22 C211 C212 117.7(6) . . ?
C27 C211 C212 119.1(6) . . ?
N21 C212 C24 123.9(6) . . ?
N21 C212 C211 116.0(6) . . ?
C24 C212 C211 120.1(6) . . ?
N31 C31 C32 178.5(11) . . ?
C31 C32 H32A 109.5 . . ?
C31 C32 H32B 109.5 . . ?
H32A C32 H32B 109.5 . . ?
C31 C32 H32C 109.5 . . ?
H32A C32 H32C 109.5 . . ?
H32B C32 H32C 109.5 . . ?

loop_
  _geom_torsion_atom_site_label_1
  _geom_torsion_atom_site_label_2
  _geom_torsion_atom_site_label_3
  _geom_torsion_atom_site_label_4
  _geom_torsion
  _geom_torsion_site_symmetry_1
  _geom_torsion_site_symmetry_2
  _geom_torsion_site_symmetry_3
  _geom_torsion_site_symmetry_4
  _geom_torsion_publ_flag
O2 Re1 O1 C1 -29.9(5) . . . . ?
Cl1 Re1 O1 C1 3(4) . . . . ?
Cl3 Re1 O1 C1 -117.0(5) . . . . ?
Cl2 Re1 O1 C1 151.8(5) . . . . ?
Cl4 Re1 O1 C1 60.6(5) . . . . ?
O1 Re1 O2 C3 13.1(6) . . . . ?
Cl1 Re1 O2 C3 -165.8(5) . . . . ?
Cl3 Re1 O2 C3 100.8(5) . . . . ?
Cl2 Re1 O2 C3 39(2) . . . . ?
Cl4 Re1 O2 C3 -75.3(5) . . . . ?
Re1 O1 C1 O3 -173.5(5) . . . . ?
Re1 O1 C1 C2 7.6(9) . . . . ?
O3 C1 C2 C3 -139.6(7) . . . . ?
O1 C1 C2 C3 39.2(9) . . . . ?
Re1 O2 C3 O4 -159.1(5) . . . . ?
Re1 O2 C3 C2 24.1(9) . . . . ?
C1 C2 C3 O4 127.4(7) . . . . ?
C1 C2 C3 O2 -55.8(9) . . . . ?
O1 C1 O3 Cu1 -16.5(8) . . . . ?
C2 C1 O3 Cu1 162.4(5) . . . . ?
C1 O3 Cu1 N12 -76.4(5) . . . . ?
C1 O3 Cu1 N22 99.3(5) . . . . ?
C1 O3 Cu1 N11 -1.8(6) . . . . ?
C1 O3 Cu1 N21 -178.5(5) . . . . ?
N12 Cu1 N11 C11 -176.8(6) . . . . ?
N22 Cu1 N11 C11 11.2(6) . . . . ?
N21 Cu1 N11 C11 -77.8(7) . . . . ?
O3 Cu1 N11 C11 107.6(6) . . . . ?
N12 Cu1 N11 C112 3.4(4) . . . . ?
N22 Cu1 N11 C112 -168.6(4) . . . . ?
N21 Cu1 N11 C112 102.5(5) . . . . ?
O3 Cu1 N11 C112 -72.2(5) . . . . ?
N22 Cu1 N12 C110 -73.5(17) . . . . ?
N11 Cu1 N12 C110 -178.1(7) . . . . ?
N21 Cu1 N12 C110 40.1(7) . . . . ?
O3 Cu1 N12 C110 -41.7(7) . . . . ?
N22 Cu1 N12 C111 100.4(16) . . . . ?
N11 Cu1 N12 C111 -4.2(5) . . . . ?
N21 Cu1 N12 C111 -146.0(5) . . . . ?
O3 Cu1 N12 C111 132.2(5) . . . . ?
C112 N11 C11 C12 0.2(10) . . . . ?
Cu1 N11 C11 C12 -179.6(6) . . . . ?
N11 C11 C12 C13 1.5(12) . . . . ?
C11 C12 C13 C14 -1.3(12) . . . . ?
C12 C13 C14 C112 -0.3(11) . . . . ?
C12 C13 C14 C15 178.8(8) . . . . ?
C112 C14 C15 C16 -2.1(12) . . . . ?
C13 C14 C15 C16 178.8(8) . . . . ?
C14 C15 C16 C17 0.4(12) . . . . ?
C15 C16 C17 C18 179.8(8) . . . . ?
C15 C16 C17 C111 0.6(11) . . . . ?
C111 C17 C18 C19 -0.3(11) . . . . ?
C16 C17 C18 C19 -179.6(8) . . . . ?
C17 C18 C19 C110 0.4(12) . . . . ?
C111 N12 C110 C19 0.5(11) . . . . ?
Cu1 N12 C110 C19 174.2(6) . . . . ?
C18 C19 C110 N12 -0.5(12) . . . . ?
C110 N12 C111 C17 -0.5(10) . . . . ?
Cu1 N12 C111 C17 -175.2(5) . . . . ?
C110 N12 C111 C112 179.0(6) . . . . ?
Cu1 N12 C111 C112 4.3(7) . . . . ?
C18 C17 C111 N12 0.4(10) . . . . ?
C16 C17 C111 N12 179.6(7) . . . . ?
C18 C17 C111 C112 -179.1(7) . . . . ?
C16 C17 C111 C112 0.2(10) . . . . ?
C11 N11 C112 C14 -2.0(10) . . . . ?
Cu1 N11 C112 C14 177.8(5) . . . . ?
C11 N11 C112 C111 178.1(6) . . . . ?
Cu1 N11 C112 C111 -2.2(7) . . . . ?
C13 C14 C112 N11 2.0(10) . . . . ?
C15 C14 C112 N11 -177.2(7) . . . . ?
C13 C14 C112 C111 -178.0(6) . . . . ?
C15 C14 C112 C111 2.8(10) . . . . ?
N12 C111 C112 N11 -1.4(9) . . . . ?
C17 C111 C112 N11 178.1(6) . . . . ?
N12 C111 C112 C14 178.6(6) . . . . ?
C17 C111 C112 C14 -1.9(9) . . . . ?
N12 Cu1 N21 C21 4.2(7) . . . . ?
N22 Cu1 N21 C21 176.6(7) . . . . ?
N11 Cu1 N21 C21 -88.4(7) . . . . ?
O3 Cu1 N21 C21 87.8(7) . . . . ?
N12 Cu1 N21 C212 -167.3(4) . . . . ?
N22 Cu1 N21 C212 5.1(4) . . . . ?
N11 Cu1 N21 C212 100.1(5) . . . . ?
O3 Cu1 N21 C212 -83.7(4) . . . . ?
N12 Cu1 N22 C210 -63.7(18) . . . . ?
N11 Cu1 N22 C210 39.7(6) . . . . ?
N21 Cu1 N22 C210 -178.6(6) . . . . ?
O3 Cu1 N22 C210 -95.4(6) . . . . ?
N12 Cu1 N22 C211 111.6(15) . . . . ?
N11 Cu1 N22 C211 -145.0(5) . . . . ?
N21 Cu1 N22 C211 -3.3(5) . . . . ?
O3 Cu1 N22 C211 79.9(5) . . . . ?
C212 N21 C21 C22 2.7(11) . . . . ?
Cu1 N21 C21 C22 -168.4(5) . . . . ?
N21 C21 C22 C23 -4.3(12) . . . . ?
C21 C22 C23 C24 2.5(11) . . . . ?
C22 C23 C24 C212 0.6(10) . . . . ?
C22 C23 C24 C25 -177.4(7) . . . . ?
C212 C24 C25 C26 3.6(12) . . . . ?
C23 C24 C25 C26 -178.4(8) . . . . ?
C24 C25 C26 C27 -1.1(13) . . . . ?
C25 C26 C27 C211 -0.4(12) . . . . ?
C25 C26 C27 C28 177.0(8) . . . . ?
C211 C27 C28 C29 -0.1(11) . . . . ?
C26 C27 C28 C29 -177.5(8) . . . . ?
C27 C28 C29 C210 0.7(12) . . . . ?
C211 N22 C210 C29 3.0(11) . . . . ?
Cu1 N22 C210 C29 178.1(6) . . . . ?
C28 C29 C210 N22 -2.2(12) . . . . ?
C210 N22 C211 C27 -2.4(10) . . . . ?
Cu1 N22 C211 C27 -178.2(5) . . . . ?
C210 N22 C211 C212 176.8(6) . . . . ?
Cu1 N22 C211 C212 1.0(8) . . . . ?
C28 C27 C211 N22 1.0(11) . . . . ?
C26 C27 C211 N22 178.5(7) . . . . ?
C28 C27 C211 C212 -178.2(6) . . . . ?
C26 C27 C211 C212 -0.7(10) . . . . ?
C21 N21 C212 C24 0.8(10) . . . . ?
Cu1 N21 C212 C24 173.6(5) . . . . ?
C21 N21 C212 C211 -178.9(6) . . . . ?
Cu1 N21 C212 C211 -6.1(7) . . . . ?
C23 C24 C212 N21 -2.4(10) . . . . ?
C25 C24 C212 N21 175.8(7) . . . . ?
C23 C24 C212 C211 177.3(6) . . . . ?
C25 C24 C212 C211 -4.6(10) . . . . ?
N22 C211 C212 N21 3.6(9) . . . . ?
C27 C211 C212 N21 -177.1(6) . . . . ?
N22 C211 C212 C24 -176.0(6) . . . . ?
C27 C211 C212 C24 3.2(10) . . . . ?

_diffrn_measured_fraction_theta_max    0.999
_diffrn_reflns_theta_full              27.45
_diffrn_measured_fraction_theta_full   0.999
_refine_diff_density_max    1.878
_refine_diff_density_min   -1.375
_refine_diff_density_rms    0.169

# END OF COMPOUND 2


data_comp3

_audit_creation_method            SHELXL-97
_chemical_name_systematic
;
  ?
;
_chemical_name_common             ?
_chemical_melting_point           ?
_chemical_formula_moiety         
  'C23 H18 Cl4 Cu N4 O4 Re'
_chemical_formula_sum
  'C23 H18 Cl4 Cu N4 O4 Re'
_chemical_formula_weight          805.95

loop_
  _atom_type_symbol
  _atom_type_description
  _atom_type_scat_dispersion_real
  _atom_type_scat_dispersion_imag
  _atom_type_scat_source
  'C'  'C'   0.0033   0.0016
  'International Tables Vol C Tables 4.2.6.8 and 6.1.1.4'
  'H'  'H'   0.0000   0.0000
  'International Tables Vol C Tables 4.2.6.8 and 6.1.1.4'
  'N'  'N'   0.0061   0.0033
  'International Tables Vol C Tables 4.2.6.8 and 6.1.1.4'
  'O'  'O'   0.0106   0.0060
  'International Tables Vol C Tables 4.2.6.8 and 6.1.1.4'
  'Cl'  'Cl'   0.1484   0.1585
  'International Tables Vol C Tables 4.2.6.8 and 6.1.1.4'
  'Cu'  'Cu'   0.3201   1.2651
  'International Tables Vol C Tables 4.2.6.8 and 6.1.1.4'
  'Re'  'Re'  -1.0185   7.2310
  'International Tables Vol C Tables 4.2.6.8 and 6.1.1.4'

_symmetry_cell_setting            monoclinic
_symmetry_space_group_name_H-M    'P 1 21/n 1'

loop_
  _symmetry_equiv_pos_as_xyz
  'x, y, z'
  'x+1/2, -y+1/2, z+1/2'
  '-x, -y, -z'
  '-x-1/2, y-1/2, -z-1/2'

_cell_length_a                    10.866(3)
_cell_length_b                    15.559(5)
_cell_length_c                    15.995(2)
_cell_angle_alpha                 90.00
_cell_angle_beta                  97.298(16)
_cell_angle_gamma                 90.00
_cell_volume                      2682.3(12)
_cell_formula_units_Z             4
_cell_measurement_temperature     273(2)
_cell_measurement_reflns_used     13
_cell_measurement_theta_min       10.19
_cell_measurement_theta_max       13.69

_exptl_crystal_description        plate
_exptl_crystal_colour             'sky blue'
_exptl_crystal_size_max           0.15
_exptl_crystal_size_mid           0.10
_exptl_crystal_size_min           0.02
_exptl_crystal_density_meas       ?
_exptl_crystal_density_diffrn     1.996
_exptl_crystal_density_method     'not measured'
_exptl_crystal_F_000              1552
_exptl_absorpt_coefficient_mu     5.738
_exptl_absorpt_correction_type    'psi-scan'
_exptl_absorpt_correction_T_min   0.4799
_exptl_absorpt_correction_T_max   0.8939
_exptl_absorpt_process_details    'MSC/AFC Diffractometer Software, 1993'


_exptl_special_details
;
  ?
;

_diffrn_ambient_temperature       273(2)
_diffrn_radiation_wavelength      0.71069
_diffrn_radiation_type            MoK\a
_diffrn_radiation_source          'fine-focus sealed tube'
_diffrn_radiation_monochromator   graphite
_diffrn_measurement_device_type   'Rigaku AFC-7S'
_diffrn_measurement_method        \q/2\q
_diffrn_detector_area_resol_mean  ?
_diffrn_standards_number          3
_diffrn_standards_interval_count  ?
_diffrn_standards_interval_time   200
_diffrn_standards_decay_%         10
_diffrn_reflns_number             5947
_diffrn_reflns_av_R_equivalents   0.0549
_diffrn_reflns_av_sigmaI/netI     0.1144
_diffrn_reflns_limit_h_min        -1
_diffrn_reflns_limit_h_max        12
_diffrn_reflns_limit_k_min        -1
_diffrn_reflns_limit_k_max        18
_diffrn_reflns_limit_l_min        -18
_diffrn_reflns_limit_l_max        18
_diffrn_reflns_theta_min          2.15
_diffrn_reflns_theta_max          24.96
_reflns_number_total              4708
_reflns_number_gt                 2890
_reflns_threshold_expression      >2sigma(I)


_computing_data_collection        'MSC/AFC Diffractometer Software, 1993'
_computing_cell_refinement        'MSC/AFC Diffractometer Software, 1993'
_computing_data_reduction         'MSC/AFC Diffractometer Software, 1993'
_computing_structure_solution     'SHELXS-97 (Sheldrick, 1990)'
_computing_structure_refinement   'SHELXL-97 (Sheldrick, 1997)'
_computing_molecular_graphics     'ZORTEP (Zsolnai & Pritzkow, 1995)'
_computing_publication_material  
'PLATON (Spek, 1990) and CSD (Allen & Kennard,1993)'

_refine_special_details
;
  Refinement of F^2^ against ALL reflections.  The weighted R-factor wR and
  goodness of fit S are based on F^2^, conventional R-factors R are based
  on F, with F set to zero for negative F^2^. The threshold expression of
  F^2^ > 2sigma(F^2^) is used only for calculating R-factors(gt) etc. and is
  not relevant to the choice of reflections for refinement.  R-factors based
  on F^2^ are statistically about twice as large as those based on F, and R-
  factors based on ALL data will be even larger.
;

_refine_ls_structure_factor_coef  Fsqd 
_refine_ls_matrix_type            full
_refine_ls_weighting_scheme       calc 
_refine_ls_weighting_details
  'calc w=1/[\s^2^(Fo^2^)+(0.0892P)^2^+17.5846P] where P=(Fo^2^+2Fc^2^)/3'
_atom_sites_solution_primary      direct
_atom_sites_solution_secondary    difmap
_atom_sites_solution_hydrogens    geom
_refine_ls_hydrogen_treatment     mixed
_refine_ls_extinction_method      none
_refine_ls_extinction_coef        ?
_refine_ls_number_reflns          4708
_refine_ls_number_parameters      344
_refine_ls_number_restraints      82
_refine_ls_R_factor_all           0.1268
_refine_ls_R_factor_gt            0.0626
_refine_ls_wR_factor_ref          0.1847
_refine_ls_wR_factor_gt           0.1629
_refine_ls_goodness_of_fit_ref    1.105
_refine_ls_restrained_S_all       1.099
_refine_ls_shift/su_max           0.001
_refine_ls_shift/su_mean          0.000

loop_
  _atom_site_label
  _atom_site_type_symbol
  _atom_site_fract_x
  _atom_site_fract_y
  _atom_site_fract_z
  _atom_site_U_iso_or_equiv
  _atom_site_adp_type
  _atom_site_occupancy
  _atom_site_symmetry_multiplicity
  _atom_site_calc_flag
  _atom_site_refinement_flags
  _atom_site_disorder_assembly
  _atom_site_disorder_group
Re1 Re 0.54020(5) 0.22678(3) 0.84479(3) 0.0308(2) Uani 1 1 d . . .
Cl1 Cl 0.5182(3) 0.1906(2) 0.9835(2) 0.0432(9) Uani 1 1 d . . .
Cl2 Cl 0.3314(4) 0.2022(3) 0.8018(3) 0.0586(12) Uani 1 1 d . . .
Cl3 Cl 0.4996(4) 0.3744(2) 0.8693(3) 0.0542(10) Uani 1 1 d . . .
Cl4 Cl 0.5910(4) 0.0852(2) 0.8142(3) 0.0568(11) Uani 1 1 d . . .
O1 O 0.5611(9) 0.2593(6) 0.7251(6) 0.039(2) Uani 1 1 d . . .
O2 O 0.7223(8) 0.2543(5) 0.8776(6) 0.032(2) Uani 1 1 d U . .
C1 C 0.6443(12) 0.3056(9) 0.6952(8) 0.033(3) Uani 1 1 d D . .
C2 C 0.749(3) 0.3451(19) 0.7564(15) 0.039(8) Uani 0.50 1 d PD . .
H2A H 0.8216 0.3488 0.7266 0.047 Uiso 0.50 1 calc PR . .
H2B H 0.7251 0.4036 0.7673 0.047 Uiso 0.50 1 calc PR . .
C2' C 0.774(3) 0.298(3) 0.7457(13) 0.068(13) Uani 0.50 1 d PD . .
H2'1 H 0.8081 0.2427 0.7311 0.082 Uiso 0.50 1 calc PR . .
H2'2 H 0.8258 0.3417 0.7251 0.082 Uiso 0.50 1 calc PR . .
C3 C 0.7919(11) 0.3037(8) 0.8418(8) 0.027(3) Uani 1 1 d DU . .
O3 O 0.6318(9) 0.3338(6) 0.6254(6) 0.040(2) Uani 1 1 d U . .
O4 O 0.8873(9) 0.3348(6) 0.8779(6) 0.043(2) Uani 1 1 d . . .
Cu1 Cu 0.46002(18) 0.25856(11) 0.52950(13) 0.0472(5) Uani 1 1 d . . .
N11 N 0.3751(10) 0.1573(7) 0.5717(6) 0.030(2) Uani 1 1 d U . .
N12 N 0.6022(10) 0.1771(7) 0.5361(6) 0.031(2) Uani 1 1 d U . .
C11 C 0.2546(13) 0.1481(10) 0.5752(9) 0.040(4) Uani 1 1 d . . .
H11 H 0.2025 0.1944 0.5599 0.048 Uiso 1 1 calc R . .
C12 C 0.2029(14) 0.0730(10) 0.6005(9) 0.047(4) Uani 1 1 d . . .
H12 H 0.1179 0.0687 0.6021 0.056 Uiso 1 1 calc R . .
C13 C 0.2807(14) 0.0038(10) 0.6235(9) 0.047(4) Uani 1 1 d . . .
H13 H 0.2486 -0.0467 0.6430 0.056 Uiso 1 1 calc R . .
C14 C 0.4050(13) 0.0105(9) 0.6174(8) 0.036(3) Uani 1 1 d U . .
H14 H 0.4578 -0.0359 0.6309 0.043 Uiso 1 1 calc R . .
C15 C 0.4516(12) 0.0891(8) 0.5902(8) 0.031(2) Uani 1 1 d U . .
C16 C 0.5813(12) 0.1018(8) 0.5763(7) 0.029(2) Uani 1 1 d U . .
C17 C 0.6731(14) 0.0442(9) 0.5977(9) 0.043(3) Uani 1 1 d U . .
H17 H 0.6561 -0.0077 0.6228 0.051 Uiso 1 1 calc R . .
C18 C 0.7932(15) 0.0631(11) 0.5821(10) 0.052(4) Uani 1 1 d . . .
H18 H 0.8579 0.0250 0.5979 0.063 Uiso 1 1 calc R . .
C19 C 0.8139(15) 0.1384(10) 0.5433(10) 0.051(4) Uani 1 1 d . . .
H19 H 0.8928 0.1515 0.5303 0.061 Uiso 1 1 calc R . .
C110 C 0.7190(11) 0.1943(9) 0.5236(9) 0.036(3) Uani 1 1 d . . .
H110 H 0.7360 0.2471 0.5003 0.043 Uiso 1 1 calc R . .
N21 N 0.4842(10) 0.3387(7) 0.4348(7) 0.035(2) Uani 1 1 d U . .
N22 N 0.3496(10) 0.3529(7) 0.5592(7) 0.036(3) Uani 1 1 d U . .
C21 C 0.5498(12) 0.3256(10) 0.3705(9) 0.040(3) Uani 1 1 d . . .
H21 H 0.5993 0.2768 0.3709 0.047 Uiso 1 1 calc R . .
C22 C 0.5466(15) 0.3815(12) 0.3042(11) 0.059(5) Uani 1 1 d . . .
H22 H 0.5918 0.3695 0.2600 0.070 Uiso 1 1 calc R . .
C23 C 0.4783(14) 0.4539(11) 0.3026(11) 0.060(5) Uani 1 1 d . . .
H23 H 0.4777 0.4926 0.2582 0.072 Uiso 1 1 calc R . .
C24 C 0.4086(14) 0.4701(9) 0.3684(10) 0.043(3) Uani 1 1 d U . .
H24 H 0.3604 0.5194 0.3690 0.052 Uiso 1 1 calc R . .
C25 C 0.4139(12) 0.4099(8) 0.4329(9) 0.033(2) Uani 1 1 d U . .
C26 C 0.3390(13) 0.4187(8) 0.5039(9) 0.035(3) Uani 1 1 d U . .
C27 C 0.2656(14) 0.4892(9) 0.5157(9) 0.044(3) Uani 1 1 d U . .
H27 H 0.2582 0.5340 0.4769 0.052 Uiso 1 1 calc R . .
C28 C 0.2032(17) 0.4920(11) 0.5859(10) 0.061(5) Uani 1 1 d . . .
H28 H 0.1519 0.5382 0.5942 0.073 Uiso 1 1 calc R . .
C29 C 0.2178(16) 0.4256(11) 0.6432(10) 0.058(5) Uani 1 1 d . . .
H29 H 0.1783 0.4273 0.6915 0.069 Uiso 1 1 calc R . .
C210 C 0.2916(14) 0.3570(10) 0.6282(9) 0.047(4) Uani 1 1 d . . .
H210 H 0.3015 0.3122 0.6670 0.056 Uiso 1 1 calc R . .

loop_
  _atom_site_aniso_label
  _atom_site_aniso_U_11
  _atom_site_aniso_U_22
  _atom_site_aniso_U_33
  _atom_site_aniso_U_23
  _atom_site_aniso_U_13
  _atom_site_aniso_U_12
Re1 0.0260(3) 0.0345(3) 0.0318(3) 0.0052(3) 0.0036(2) -0.0038(3)
Cl1 0.050(2) 0.046(2) 0.0354(18) 0.0062(16) 0.0100(16) -0.0026(18)
Cl2 0.038(2) 0.079(3) 0.058(2) 0.027(2) 0.0021(19) -0.018(2)
Cl3 0.061(3) 0.034(2) 0.072(3) 0.0094(19) 0.023(2) 0.0034(19)
Cl4 0.071(3) 0.043(2) 0.055(2) -0.0095(19) 0.003(2) 0.003(2)
O1 0.031(5) 0.056(6) 0.031(5) 0.009(4) 0.002(4) -0.011(5)
O2 0.031(2) 0.033(2) 0.032(2) 0.0000(10) 0.0032(10) -0.0006(10)
C1 0.032(8) 0.036(8) 0.032(8) 0.007(6) 0.012(6) 0.000(7)
C2 0.040(19) 0.031(17) 0.048(19) 0.004(15) 0.009(15) -0.024(16)
C2' 0.07(3) 0.09(4) 0.04(2) -0.01(2) -0.006(18) 0.00(3)
C3 0.015(6) 0.037(6) 0.031(6) 0.003(5) 0.007(5) -0.005(5)
O3 0.050(5) 0.035(5) 0.033(5) 0.001(4) 0.004(4) -0.006(4)
O4 0.038(6) 0.036(5) 0.054(6) -0.001(5) 0.002(5) -0.004(5)
Cu1 0.0465(11) 0.0310(9) 0.0704(13) 0.0246(9) 0.0321(10) 0.0176(8)
N11 0.031(6) 0.030(5) 0.029(5) 0.007(4) 0.010(4) 0.003(5)
N12 0.033(6) 0.027(5) 0.032(5) -0.002(4) 0.003(4) 0.008(5)
C11 0.038(9) 0.045(9) 0.042(8) 0.010(7) 0.021(7) 0.008(7)
C12 0.031(8) 0.065(11) 0.043(8) -0.003(8) -0.004(7) -0.012(8)
C13 0.044(9) 0.045(9) 0.051(9) 0.013(7) 0.004(7) -0.016(8)
C14 0.041(7) 0.033(6) 0.032(6) 0.002(5) -0.003(6) -0.008(6)
C15 0.034(5) 0.030(5) 0.027(5) -0.003(4) -0.003(4) -0.003(4)
C16 0.040(5) 0.020(5) 0.027(5) 0.000(4) -0.002(4) 0.001(4)
C17 0.053(8) 0.038(7) 0.037(6) 0.009(6) 0.003(6) 0.009(6)
C18 0.041(10) 0.058(10) 0.057(10) 0.003(9) 0.005(8) 0.018(8)
C19 0.036(9) 0.056(10) 0.062(10) -0.007(9) 0.017(8) -0.004(8)
C110 0.014(7) 0.044(8) 0.050(8) -0.007(7) 0.006(6) -0.002(6)
N21 0.028(6) 0.027(5) 0.051(6) 0.000(5) 0.009(5) -0.002(5)
N22 0.034(6) 0.026(5) 0.046(6) 0.000(5) -0.002(5) 0.002(5)
C21 0.023(7) 0.045(9) 0.053(9) 0.015(7) 0.013(7) 0.007(7)
C22 0.039(10) 0.073(12) 0.063(11) 0.032(10) 0.005(8) 0.020(9)
C23 0.039(10) 0.070(12) 0.070(11) 0.042(10) -0.001(9) -0.009(9)
C24 0.038(7) 0.027(6) 0.062(7) 0.015(6) -0.002(6) 0.005(6)
C25 0.023(5) 0.022(5) 0.050(5) 0.005(4) -0.006(5) -0.004(4)
C26 0.035(5) 0.021(5) 0.045(5) 0.001(4) -0.009(5) 0.002(4)
C27 0.050(7) 0.030(6) 0.049(7) -0.004(6) 0.000(6) 0.009(6)
C28 0.072(13) 0.050(10) 0.060(11) -0.008(9) 0.008(10) 0.026(10)
C29 0.059(11) 0.066(12) 0.048(9) -0.029(9) 0.006(8) 0.004(9)
C210 0.053(10) 0.050(9) 0.041(8) 0.007(7) 0.023(8) 0.018(8)

_geom_special_details
;
  All esds (except the esd in the dihedral angle between two l.s. planes)
  are estimated using the full covariance matrix.  The cell esds are taken
  into account individually in the estimation of esds in distances, angles
  and torsion angles; correlations between esds in cell parameters are only
  used when they are defined by crystal symmetry.  An approximate (isotropic)
  treatment of cell esds is used for estimating esds involving l.s. planes.

Angles between planes (with approximate esd)

Carboxylate(C3 O2 O4) - Carboxylate(C1 O1 O3) = 4.8(17)
Carboxylate(C1 O1 O3) - Equatorial plane (Cl1 Cl2 O1 O2) = 16.2(10)
Carboxylate(C3 O2 O4) - Equatorial plane (Cl1 Cl2 O1 O2) = 20.5(9)
Equatorial plane(Cl1 Cl2 O1 O2) - Ring planar section(C1 O1 O2 C3)=17.9(7)

Carboxylate(C1 O1 O3) - Equatorial Plane (O3 N11 N21) = 18.9(10)
Equatorial Plane (N3 N11 N21) - Apical Atoms-M plane(N22 N12 CU1)=80.6(6)
Angle between (N11 N12 CU1) and (N21 N22 CU1) = 38.8(6)

Angle between both BIPY molecules = 45.27(25)
Angle between both pyridyl moieties in BIPY1 = 8.3(6)
Angle between both pyridyl moieties in BIPY2 = 2.4(10)

  Least-squares planes (x,y,z in crystal coordinates) and deviations from them
  (* indicates atom used to define plane)

  - 5.2343 (0.0898) x + 12.9139 (0.1179) y + 5.4387 (0.1741) z = 4.3554 (0.0795)

  *    0.0000 (0.0000)  O1
  *    0.0000 (0.0000)  C1
  *    0.0000 (0.0000)  C3

  Rms deviation of fitted atoms =   0.0000

-------------------------------------------
  - 6.0095 (0.0669) x + 12.3003 (0.0964) y + 5.2946 (0.3665) z = 3.4338 (0.3318)

  *    0.0000 (0.0000)  O2
  *    0.0000 (0.0000)  C3
  *    0.0000 (0.0000)  O4

  Rms deviation of fitted atoms =   0.0000

------------------------------------------
  - 2.6450 (0.0249) x + 14.7982 (0.0129) y + 3.5090 (0.0384) z = 4.9149 (0.0330)

  *   -0.0144 (0.0034)  Cl1
  *    0.0148 (0.0034)  Cl2
  *   -0.0175 (0.0041)  O1
  *    0.0171 (0.0040)  O2
      -0.0235 (0.0037)  Re1
       0.3430 (0.0173)  C1
       0.8642 (0.0357)  C2
       0.0576 (0.0504)  C2'
       0.4385 (0.0162)  C3
       0.5481 (0.0160)  O3
       0.7730 (0.0149)  O4
       2.3538 (0.0055)  Cl3
      -2.3599 (0.0054)  Cl4
      -0.4475 (0.0144)  Cu1

  Rms deviation of fitted atoms =   0.0160

-----------------------------------------
  - 5.3910 (0.0750) x + 12.6409 (0.0836) y + 5.8657 (0.0868) z = 4.4876 (0.0583)

  *    0.0187 (0.0056)  O1
  *   -0.0192 (0.0057)  O2
  *   -0.0198 (0.0059)  C1
  *    0.0202 (0.0061)  C3
       0.4222 (0.0177)  Re1
       0.2717 (0.0410)  C2
      -0.5258 (0.0450)  C2'
      -0.0055 (0.0204)  O3
       0.1105 (0.0202)  O4
       0.8965 (0.0327)  Cl1
       0.9855 (0.0329)  Cl2

  Rms deviation of fitted atoms =   0.0195

------------------------------------------
  - 7.8995 (0.0271) x + 9.5493 (0.0449) y + 6.3618 (0.0662) z = 2.1756 (0.0437)

  *    0.0000 (0.0000)  O3
  *    0.0000 (0.0000)  N11
  *    0.0000 (0.0000)  N21
       0.0281 (0.0067)  Cu1
      -1.8305 (0.0119)  N12
       1.9902 (0.0131)  N22

  Rms deviation of fitted atoms =   0.0000

------------------------------------------
   6.4008 (0.0956) x + 10.3199 (0.1054) y - 8.5201 (0.2918) z = 1.1100 (0.2209)

  *    0.0043 (0.0005)  N12
  *   -0.0087 (0.0010)  Cu1
  *    0.0043 (0.0005)  N22
       1.0497 (0.0516)  O3
      -1.9566 (0.0116)  N11
       0.0043 (0.0005)  N22

  Rms deviation of fitted atoms =   0.0061

----------------------------------------
   1.8897 (0.0576) x + 4.4894 (0.0739) y + 14.5850 (0.0353) z = 9.7529 (0.0146)

  *    0.0000 (0.0000)  N11
  *    0.0000 (0.0000)  Cu1
  *    0.0000 (0.0000)  N12

  Rms deviation of fitted atoms =   0.0000

------------------------------------------
   7.6761 (0.0438) x + 6.6086 (0.0741) y + 7.5474 (0.0802) z = 9.2362 (0.0238)

  *    0.0000 (0.0001)  N21
  *    0.0000 (0.0001)  Cu1
  *    0.0000 (0.0000)  N22

  Rms deviation of fitted atoms =   0.0000

-------------------------------------------
   0.2964 (0.0596) x + 4.9026 (0.0757) y + 14.9960 (0.0292) z = 9.4347 (0.0164)

  *    0.0204 (0.0086)  N11
  *   -0.0074 (0.0098)  C11
  *   -0.0117 (0.0102)  C12
  *    0.0176 (0.0104)  C13
  *   -0.0049 (0.0096)  C14
  *   -0.0141 (0.0086)  C15
      -0.0904 (0.0175)  Cu1

  Rms deviation of fitted atoms =   0.0138

-----------------------------------------
   0.8183 (0.0619) x + 6.8401 (0.0763) y + 14.0472 (0.0436) z = 9.2546 (0.0333)

  *    0.0125 (0.0086)  C16
  *   -0.0049 (0.0100)  C17
  *    0.0033 (0.0107)  C18
  *   -0.0099 (0.0105)  C19
  *    0.0180 (0.0097)  C110
  *   -0.0190 (0.0083)  N12
       0.3284 (0.0175)  Cu1

  Rms deviation of fitted atoms =   0.0127

-----------------------------------------
   7.7880 (0.0472) x + 7.6905 (0.0790) y + 6.3484 (0.0869) z = 9.1320 (0.0202)

  *    0.0035 (0.0087)  N21
  *    0.0059 (0.0106)  C21
  *   -0.0101 (0.0119)  C22
  *    0.0050 (0.0113)  C23
  *    0.0041 (0.0100)  C24
  *   -0.0085 (0.0091)  C25
      -0.1995 (0.0186)  Cu1

  Rms deviation of fitted atoms =   0.0066

-----------------------------------------
   7.9429 (0.0449) x + 7.1224 (0.0869) y + 6.5441 (0.0889) z = 8.9636 (0.0412)

  *    0.0088 (0.0093)  C26
  *    0.0042 (0.0104)  C27
  *   -0.0120 (0.0117)  C28
  *    0.0070 (0.0118)  C29
  *    0.0060 (0.0107)  C210
  *   -0.0139 (0.0093)  N22
      -0.0031 (0.0203)  Cu1

  Rms deviation of fitted atoms =   0.0093

-----------------------------------------
   0.7560 (0.0207) x + 5.9085 (0.0543) y + 14.4944 (0.0220) z = 9.3586 (0.0126)

  *    0.1404 (0.0098)  N11
  *   -0.0857 (0.0096)  N12
  *    0.0462 (0.0114)  C11
  *   -0.0701 (0.0120)  C12
  *   -0.0861 (0.0121)  C13
  *   -0.0418 (0.0115)  C14
  *    0.0632 (0.0115)  C15
  *    0.0352 (0.0113)  C16
  *    0.0754 (0.0123)  C17
  *    0.0514 (0.0124)  C18
  *   -0.0505 (0.0128)  C19
  *   -0.0776 (0.0110)  C110
       0.1917 (0.0106)  Cu1
       2.1565 (0.0144)  O3

  Rms deviation of fitted atoms =   0.0738

------------------------------------------
   7.7527 (0.0205) x + 7.4365 (0.0597) y + 6.6792 (0.0343) z = 9.1286 (0.0124)

  *    0.0476 (0.0103)  N21
  *   -0.0590 (0.0103)  N22
  *    0.0297 (0.0120)  C21
  *   -0.0222 (0.0144)  C22
  *   -0.0237 (0.0131)  C23
  *   -0.0045 (0.0125)  C24
  *    0.0193 (0.0115)  C25
  *   -0.0211 (0.0123)  C26
  *    0.0120 (0.0125)  C27
  *    0.0181 (0.0139)  C28
  *    0.0212 (0.0135)  C29
  *   -0.0175 (0.0127)  C210
      -0.1028 (0.0119)  Cu1
       2.4290 (0.0151)  O3

  Rms deviation of fitted atoms =   0.0285

---------------------------------------------
   5.0965 (0.0492) x + 5.8825 (0.0577) y + 11.7106 (0.0565) z = 9.9698 (0.0076)

  *   -0.4381 (0.0062)  N11
  *    0.4199 (0.0060)  N12
  *   -0.4183 (0.0058)  N21
  *    0.4366 (0.0059)  N22
       0.0964 (0.0057)  Cu1
       2.5378 (0.0108)  O3

  Rms deviation of fitted atoms =   0.4283

------------------------------------------
;

loop_
  _geom_bond_atom_site_label_1
  _geom_bond_atom_site_label_2
  _geom_bond_distance
  _geom_bond_site_symmetry_2
  _geom_bond_publ_flag
Re1 O1 2.020(9) . ?
Re1 O2 2.027(9) . ?
Re1 Cl2 2.318(4) . ?
Re1 Cl1 2.331(3) . ?
Re1 Cl4 2.337(4) . ?
Re1 Cl3 2.380(4) . ?
O1 C1 1.294(16) . ?
O2 C3 1.265(15) . ?
C1 O3 1.191(15) . ?
C1 C2 1.53(2) . ?
C1 C2' 1.54(2) . ?
C2 C3 1.53(2) . ?
C2 H2A 0.9700 . ?
C2 H2B 0.9700 . ?
C2' C3 1.53(2) . ?
C2' H2'1 0.9700 . ?
C2' H2'2 0.9700 . ?
C3 O4 1.221(15) . ?
O3 Cu1 2.546(9) . ?
Cu1 N11 1.987(10) . ?
Cu1 N12 1.991(10) . ?
Cu1 N22 1.991(11) . ?
Cu1 N21 2.005(11) . ?
N11 C11 1.326(17) . ?
N11 C15 1.357(16) . ?
N12 C110 1.337(17) . ?
N12 C16 1.369(16) . ?
C11 C12 1.38(2) . ?
C11 H11 0.9300 . ?
C12 C13 1.39(2) . ?
C12 H12 0.9300 . ?
C13 C14 1.37(2) . ?
C13 H13 0.9300 . ?
C14 C15 1.413(19) . ?
C14 H14 0.9300 . ?
C15 C16 1.469(19) . ?
C16 C17 1.352(19) . ?
C17 C18 1.39(2) . ?
C17 H17 0.9300 . ?
C18 C19 1.36(2) . ?
C18 H18 0.9300 . ?
C19 C110 1.36(2) . ?
C19 H19 0.9300 . ?
C110 H110 0.9300 . ?
N21 C21 1.340(17) . ?
N21 C25 1.344(17) . ?
N22 C210 1.340(18) . ?
N22 C26 1.349(17) . ?
C21 C22 1.37(2) . ?
C21 H21 0.9300 . ?
C22 C23 1.35(2) . ?
C22 H22 0.9300 . ?
C23 C24 1.40(2) . ?
C23 H23 0.9300 . ?
C24 C25 1.390(19) . ?
C24 H24 0.9300 . ?
C25 C26 1.49(2) . ?
C26 C27 1.384(19) . ?
C27 C28 1.38(2) . ?
C27 H27 0.9300 . ?
C28 C29 1.38(2) . ?
C28 H28 0.9300 . ?
C29 C210 1.37(2) . ?
C29 H29 0.9300 . ?
C210 H210 0.9300 . ?

loop_
  _geom_angle_atom_site_label_1
  _geom_angle_atom_site_label_2
  _geom_angle_atom_site_label_3
  _geom_angle
  _geom_angle_site_symmetry_1
  _geom_angle_site_symmetry_3
  _geom_angle_publ_flag
O1 Re1 O2 88.2(4) . . ?
O1 Re1 Cl2 89.1(3) . . ?
O2 Re1 Cl2 176.6(3) . . ?
O1 Re1 Cl1 179.2(3) . . ?
O2 Re1 Cl1 91.1(3) . . ?
Cl2 Re1 Cl1 91.60(14) . . ?
O1 Re1 Cl4 88.8(3) . . ?
O2 Re1 Cl4 90.3(3) . . ?
Cl2 Re1 Cl4 91.77(16) . . ?
Cl1 Re1 Cl4 91.56(14) . . ?
O1 Re1 Cl3 87.7(3) . . ?
O2 Re1 Cl3 87.1(3) . . ?
Cl2 Re1 Cl3 90.74(16) . . ?
Cl1 Re1 Cl3 91.89(14) . . ?
Cl4 Re1 Cl3 175.68(15) . . ?
C1 O1 Re1 131.1(8) . . ?
C3 O2 Re1 129.1(8) . . ?
O3 C1 O1 123.3(12) . . ?
O3 C1 C2 115.9(14) . . ?
O1 C1 C2 119.1(14) . . ?
O3 C1 C2' 120.6(18) . . ?
O1 C1 C2' 113.5(19) . . ?
C2 C1 C2' 30.7(16) . . ?
C3 C2 C1 121.1(17) . . ?
C3 C2 H2A 107.1 . . ?
C1 C2 H2A 107.1 . . ?
C3 C2 H2B 107.1 . . ?
C1 C2 H2B 107.1 . . ?
H2A C2 H2B 106.8 . . ?
C3 C2' C1 121(2) . . ?
C3 C2' H2'1 107.1 . . ?
C1 C2' H2'1 107.1 . . ?
C3 C2' H2'2 107.1 . . ?
C1 C2' H2'2 107.1 . . ?
H2'1 C2' H2'2 106.8 . . ?
O4 C3 O2 123.2(11) . . ?
O4 C3 C2' 119.4(18) . . ?
O2 C3 C2' 114(2) . . ?
O4 C3 C2 113.4(13) . . ?
O2 C3 C2 122.1(14) . . ?
C2' C3 C2 30.8(16) . . ?
C1 O3 Cu1 112.6(8) . . ?
N11 Cu1 N12 82.4(4) . . ?
N11 Cu1 N22 100.6(5) . . ?
N12 Cu1 N22 160.7(4) . . ?
N11 Cu1 N21 149.4(4) . . ?
N12 Cu1 N21 105.1(4) . . ?
N22 Cu1 N21 82.1(5) . . ?
N11 Cu1 O3 119.8(4) . . ?
N12 Cu1 O3 75.9(4) . . ?
N22 Cu1 O3 86.3(4) . . ?
N21 Cu1 O3 90.8(4) . . ?
C11 N11 C15 119.1(12) . . ?
C11 N11 Cu1 127.2(9) . . ?
C15 N11 Cu1 113.4(9) . . ?
C110 N12 C16 117.3(11) . . ?
C110 N12 Cu1 127.6(9) . . ?
C16 N12 Cu1 113.3(9) . . ?
N11 C11 C12 123.1(14) . . ?
N11 C11 H11 118.5 . . ?
C12 C11 H11 118.5 . . ?
C11 C12 C13 118.5(14) . . ?
C11 C12 H12 120.7 . . ?
C13 C12 H12 120.7 . . ?
C14 C13 C12 119.7(14) . . ?
C14 C13 H13 120.2 . . ?
C12 C13 H13 120.2 . . ?
C13 C14 C15 118.8(14) . . ?
C13 C14 H14 120.6 . . ?
C15 C14 H14 120.6 . . ?
N11 C15 C14 120.7(12) . . ?
N11 C15 C16 115.8(11) . . ?
C14 C15 C16 123.5(12) . . ?
C17 C16 N12 121.7(13) . . ?
C17 C16 C15 124.3(12) . . ?
N12 C16 C15 113.9(11) . . ?
C16 C17 C18 119.5(14) . . ?
C16 C17 H17 120.2 . . ?
C18 C17 H17 120.2 . . ?
C19 C18 C17 118.6(14) . . ?
C19 C18 H18 120.7 . . ?
C17 C18 H18 120.7 . . ?
C110 C19 C18 119.6(15) . . ?
C110 C19 H19 120.2 . . ?
C18 C19 H19 120.2 . . ?
N12 C110 C19 123.1(14) . . ?
N12 C110 H110 118.5 . . ?
C19 C110 H110 118.5 . . ?
C21 N21 C25 117.7(12) . . ?
C21 N21 Cu1 128.3(9) . . ?
C25 N21 Cu1 113.7(9) . . ?
C210 N22 C26 119.6(12) . . ?
C210 N22 Cu1 126.4(10) . . ?
C26 N22 Cu1 114.0(10) . . ?
N21 C21 C22 122.3(14) . . ?
N21 C21 H21 118.8 . . ?
C22 C21 H21 118.8 . . ?
C23 C22 C21 120.4(17) . . ?
C23 C22 H22 119.8 . . ?
C21 C22 H22 119.8 . . ?
C22 C23 C24 119.1(14) . . ?
C22 C23 H23 120.4 . . ?
C24 C23 H23 120.4 . . ?
C25 C24 C23 117.6(14) . . ?
C25 C24 H24 121.2 . . ?
C23 C24 H24 121.2 . . ?
N21 C25 C24 122.9(14) . . ?
N21 C25 C26 115.0(11) . . ?
C24 C25 C26 122.1(12) . . ?
N22 C26 C27 121.0(14) . . ?
N22 C26 C25 115.0(12) . . ?
C27 C26 C25 124.0(13) . . ?
C26 C27 C28 119.1(14) . . ?
C26 C27 H27 120.5 . . ?
C28 C27 H27 120.5 . . ?
C29 C28 C27 119.3(15) . . ?
C29 C28 H28 120.3 . . ?
C27 C28 H28 120.3 . . ?
C210 C29 C28 119.1(16) . . ?
C210 C29 H29 120.4 . . ?
C28 C29 H29 120.4 . . ?
N22 C210 C29 121.8(14) . . ?
N22 C210 H210 119.1 . . ?
C29 C210 H210 119.1 . . ?

loop_
  _geom_torsion_atom_site_label_1
  _geom_torsion_atom_site_label_2
  _geom_torsion_atom_site_label_3
  _geom_torsion_atom_site_label_4
  _geom_torsion
  _geom_torsion_site_symmetry_1
  _geom_torsion_site_symmetry_2
  _geom_torsion_site_symmetry_3
  _geom_torsion_site_symmetry_4
  _geom_torsion_publ_flag
O2 Re1 O1 C1 -20.4(12) . . . . ?
Cl2 Re1 O1 C1 157.5(12) . . . . ?
Cl1 Re1 O1 C1 9(24) . . . . ?
Cl4 Re1 O1 C1 -110.7(12) . . . . ?
Cl3 Re1 O1 C1 66.8(12) . . . . ?
O1 Re1 O2 C3 24.3(11) . . . . ?
Cl2 Re1 O2 C3 -13(5) . . . . ?
Cl1 Re1 O2 C3 -155.4(10) . . . . ?
Cl4 Re1 O2 C3 113.1(11) . . . . ?
Cl3 Re1 O2 C3 -63.5(10) . . . . ?
Re1 O1 C1 O3 -164.2(10) . . . . ?
Re1 O1 C1 C2 0(2) . . . . ?
Re1 O1 C1 C2' 34(2) . . . . ?
O3 C1 C2 C3 -168(2) . . . . ?
O1 C1 C2 C3 26(4) . . . . ?
C2' C1 C2 C3 -61(3) . . . . ?
O3 C1 C2' C3 151(3) . . . . ?
O1 C1 C2' C3 -47(4) . . . . ?
C2 C1 C2' C3 61(3) . . . . ?
Re1 O2 C3 O4 158.3(9) . . . . ?
Re1 O2 C3 C2' -42(2) . . . . ?
Re1 O2 C3 C2 -8(2) . . . . ?
C1 C2' C3 O4 -148(3) . . . . ?
C1 C2' C3 O2 52(4) . . . . ?
C1 C2' C3 C2 -61(3) . . . . ?
C1 C2 C3 O4 170(2) . . . . ?
C1 C2 C3 O2 -23(4) . . . . ?
C1 C2 C3 C2' 61(3) . . . . ?
O1 C1 O3 Cu1 -17.3(17) . . . . ?
C2 C1 O3 Cu1 177.8(18) . . . . ?
C2' C1 O3 Cu1 143(2) . . . . ?
C1 O3 Cu1 N11 -5.5(11) . . . . ?
C1 O3 Cu1 N12 -78.0(10) . . . . ?
C1 O3 Cu1 N22 94.5(10) . . . . ?
C1 O3 Cu1 N21 176.6(10) . . . . ?
N12 Cu1 N11 C11 -168.1(12) . . . . ?
N22 Cu1 N11 C11 31.2(12) . . . . ?
N21 Cu1 N11 C11 -61.2(15) . . . . ?
O3 Cu1 N11 C11 123.0(11) . . . . ?
N12 Cu1 N11 C15 5.0(8) . . . . ?
N22 Cu1 N11 C15 -155.7(8) . . . . ?
N21 Cu1 N11 C15 111.9(10) . . . . ?
O3 Cu1 N11 C15 -63.9(9) . . . . ?
N11 Cu1 N12 C110 -173.8(12) . . . . ?
N22 Cu1 N12 C110 -73.5(19) . . . . ?
N21 Cu1 N12 C110 36.5(12) . . . . ?
O3 Cu1 N12 C110 -50.4(11) . . . . ?
N11 Cu1 N12 C16 -9.5(8) . . . . ?
N22 Cu1 N12 C16 90.8(16) . . . . ?
N21 Cu1 N12 C16 -159.2(8) . . . . ?
O3 Cu1 N12 C16 113.9(8) . . . . ?
C15 N11 C11 C12 3(2) . . . . ?
Cu1 N11 C11 C12 175.6(10) . . . . ?
N11 C11 C12 C13 0(2) . . . . ?
C11 C12 C13 C14 -3(2) . . . . ?
C12 C13 C14 C15 2(2) . . . . ?
C11 N11 C15 C14 -3.5(18) . . . . ?
Cu1 N11 C15 C14 -177.2(9) . . . . ?
C11 N11 C15 C16 173.9(11) . . . . ?
Cu1 N11 C15 C16 0.2(14) . . . . ?
C13 C14 C15 N11 1.0(19) . . . . ?
C13 C14 C15 C16 -176.1(13) . . . . ?
C110 N12 C16 C17 -4.1(18) . . . . ?
Cu1 N12 C16 C17 -170.1(10) . . . . ?
C110 N12 C16 C15 178.0(11) . . . . ?
Cu1 N12 C16 C15 12.0(13) . . . . ?
N11 C15 C16 C17 174.1(12) . . . . ?
C14 C15 C16 C17 -9(2) . . . . ?
N11 C15 C16 N12 -8.2(16) . . . . ?
C14 C15 C16 N12 169.1(11) . . . . ?
N12 C16 C17 C18 3(2) . . . . ?
C15 C16 C17 C18 -179.6(13) . . . . ?
C16 C17 C18 C19 -2(2) . . . . ?
C17 C18 C19 C110 2(2) . . . . ?
C16 N12 C110 C19 5(2) . . . . ?
Cu1 N12 C110 C19 168.5(11) . . . . ?
C18 C19 C110 N12 -4(2) . . . . ?
N11 Cu1 N21 C21 -78.8(15) . . . . ?
N12 Cu1 N21 C21 22.0(13) . . . . ?
N22 Cu1 N21 C21 -176.3(12) . . . . ?
O3 Cu1 N21 C21 97.6(12) . . . . ?
N11 Cu1 N21 C25 93.6(12) . . . . ?
N12 Cu1 N21 C25 -165.6(9) . . . . ?
N22 Cu1 N21 C25 -3.9(9) . . . . ?
O3 Cu1 N21 C25 -90.0(9) . . . . ?
N11 Cu1 N22 C210 36.3(13) . . . . ?
N12 Cu1 N22 C210 -61(2) . . . . ?
N21 Cu1 N22 C210 -174.6(13) . . . . ?
O3 Cu1 N22 C210 -83.3(12) . . . . ?
N11 Cu1 N22 C26 -146.1(9) . . . . ?
N12 Cu1 N22 C26 116.6(14) . . . . ?
N21 Cu1 N22 C26 3.0(9) . . . . ?
O3 Cu1 N22 C26 94.3(9) . . . . ?
C25 N21 C21 C22 0(2) . . . . ?
Cu1 N21 C21 C22 171.8(12) . . . . ?
N21 C21 C22 C23 2(3) . . . . ?
C21 C22 C23 C24 -2(3) . . . . ?
C22 C23 C24 C25 0(2) . . . . ?
C21 N21 C25 C24 -1.1(19) . . . . ?
Cu1 N21 C25 C24 -174.4(10) . . . . ?
C21 N21 C25 C26 177.3(12) . . . . ?
Cu1 N21 C25 C26 4.1(14) . . . . ?
C23 C24 C25 N21 1(2) . . . . ?
C23 C24 C25 C26 -177.2(13) . . . . ?
C210 N22 C26 C27 -2(2) . . . . ?
Cu1 N22 C26 C27 180.0(10) . . . . ?
C210 N22 C26 C25 176.1(12) . . . . ?
Cu1 N22 C26 C25 -1.6(14) . . . . ?
N21 C25 C26 N22 -1.7(16) . . . . ?
C24 C25 C26 N22 176.8(12) . . . . ?
N21 C25 C26 C27 176.7(12) . . . . ?
C24 C25 C26 C27 -5(2) . . . . ?
N22 C26 C27 C28 1(2) . . . . ?
C25 C26 C27 C28 -177.7(14) . . . . ?
C26 C27 C28 C29 1(2) . . . . ?
C27 C28 C29 C210 -2(3) . . . . ?
C26 N22 C210 C29 2(2) . . . . ?
Cu1 N22 C210 C29 179.5(12) . . . . ?
C28 C29 C210 N22 0(3) . . . . ?

_diffrn_measured_fraction_theta_max    1.000
_diffrn_reflns_theta_full              24.96
_diffrn_measured_fraction_theta_full   1.000
_refine_diff_density_max    3.187
_refine_diff_density_min   -1.718
_refine_diff_density_rms    0.270

#===END
